# Supplementary material for: Combining inferred regulatory and reconstructed metabolic networks enhances phenotype prediction in yeast
Source: PubMed Central journal article supplement (PMC5453602; doi:10.1371/journal.pcbi.1005489), 2017-05-17

# Predictions from Yeast 6 (Threshold=0.121)

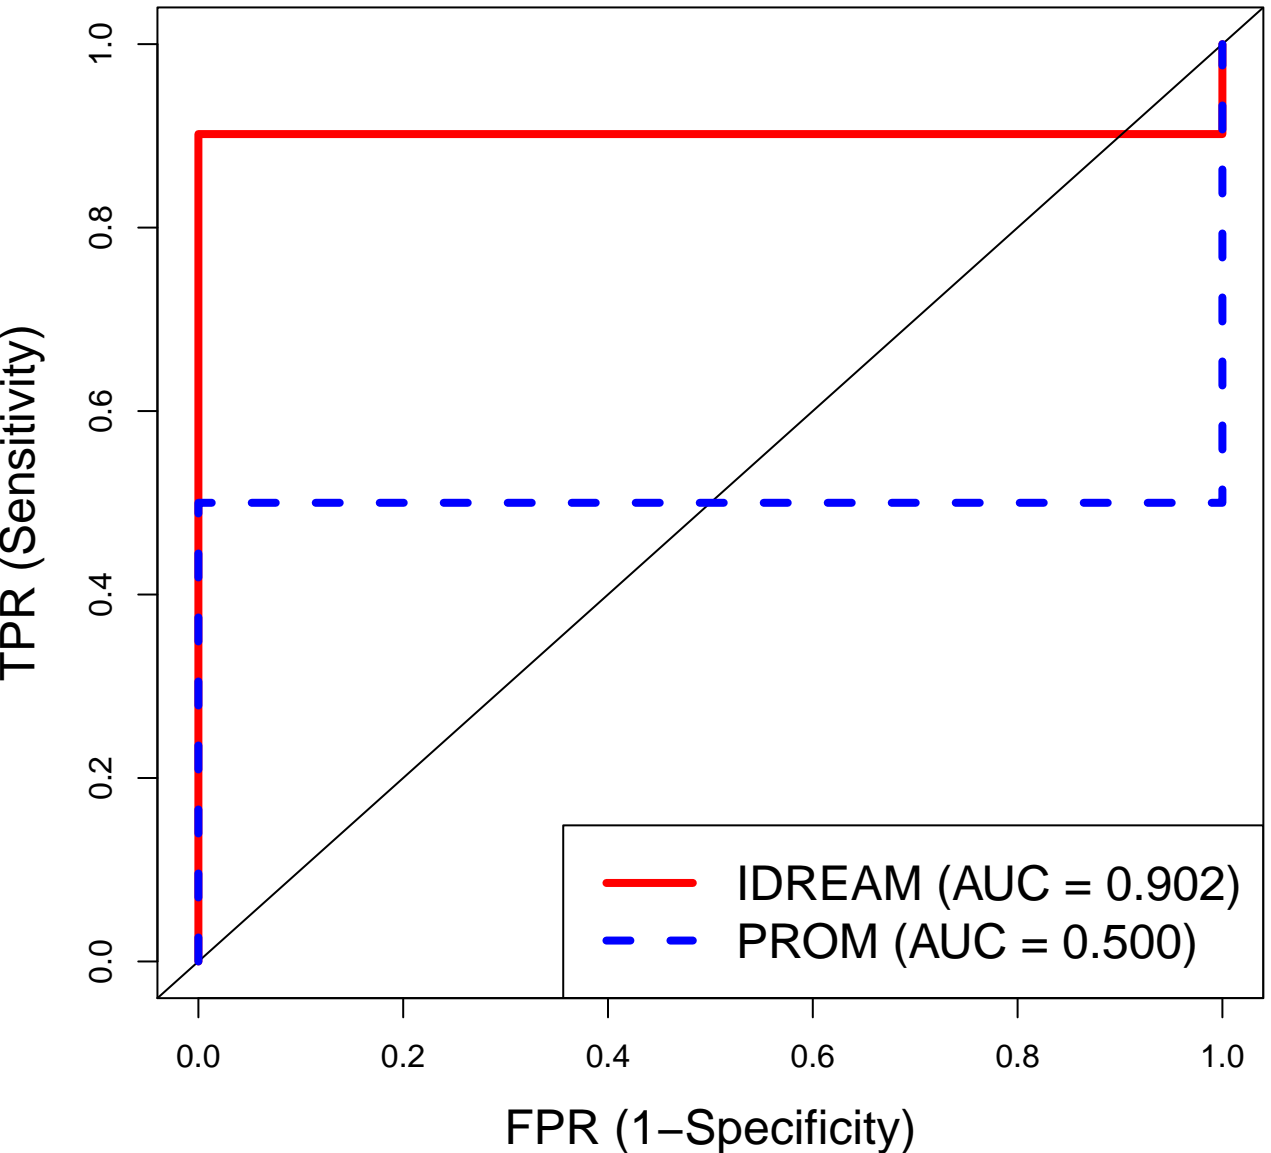

# Predictions from Yeast 6 (Threshold=0.152)

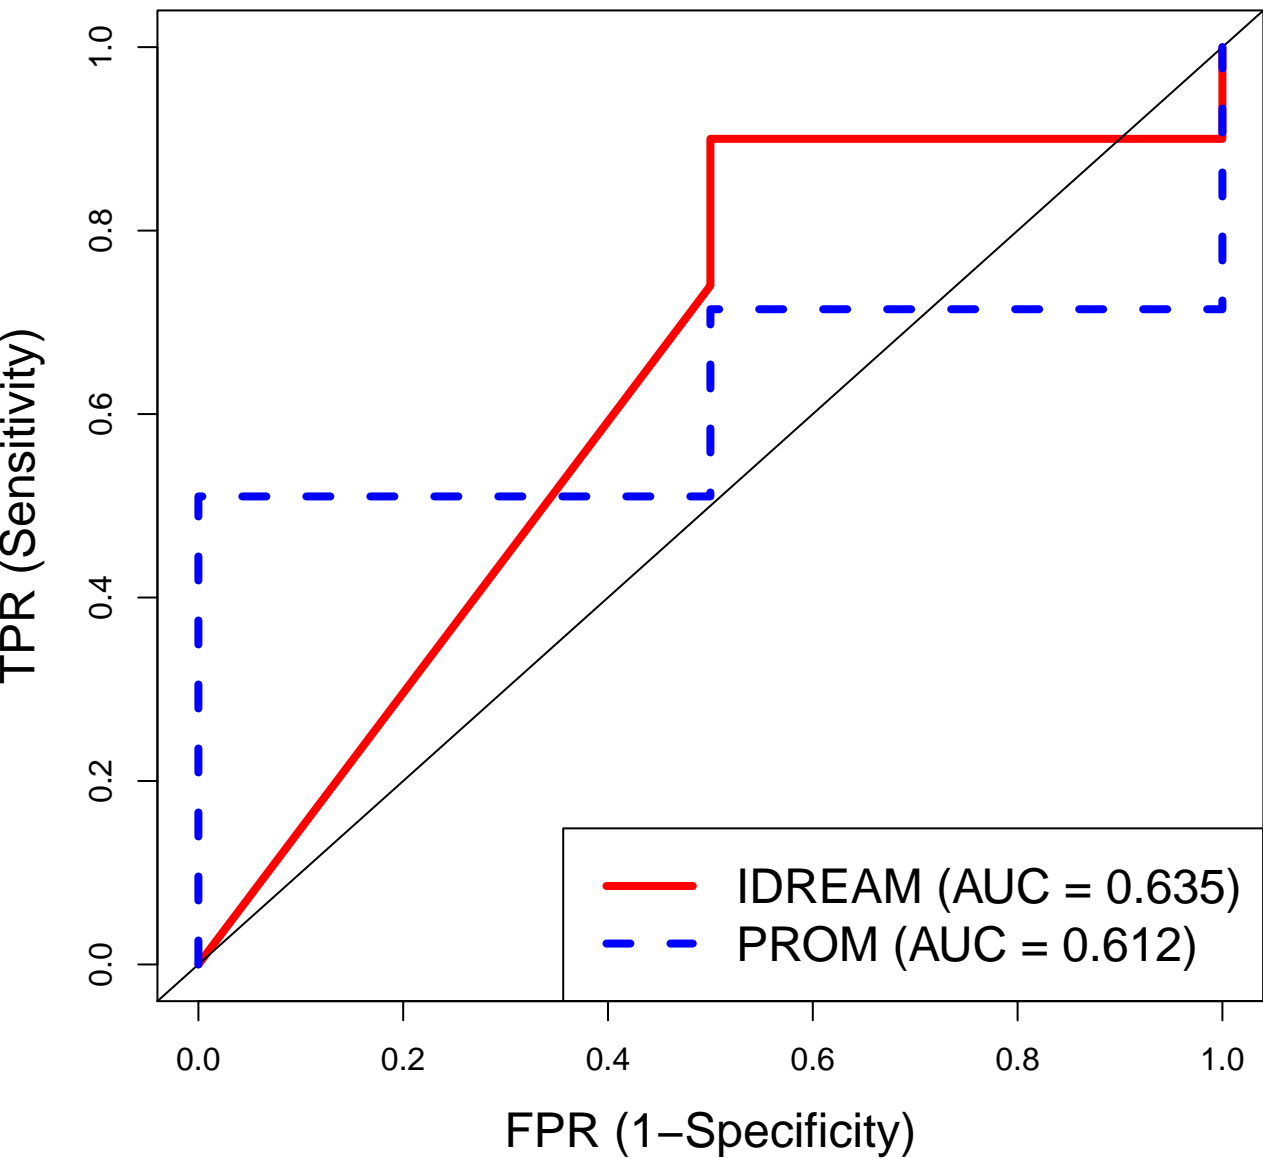

# Predictions from Yeast 6 (Threshold=0.182)

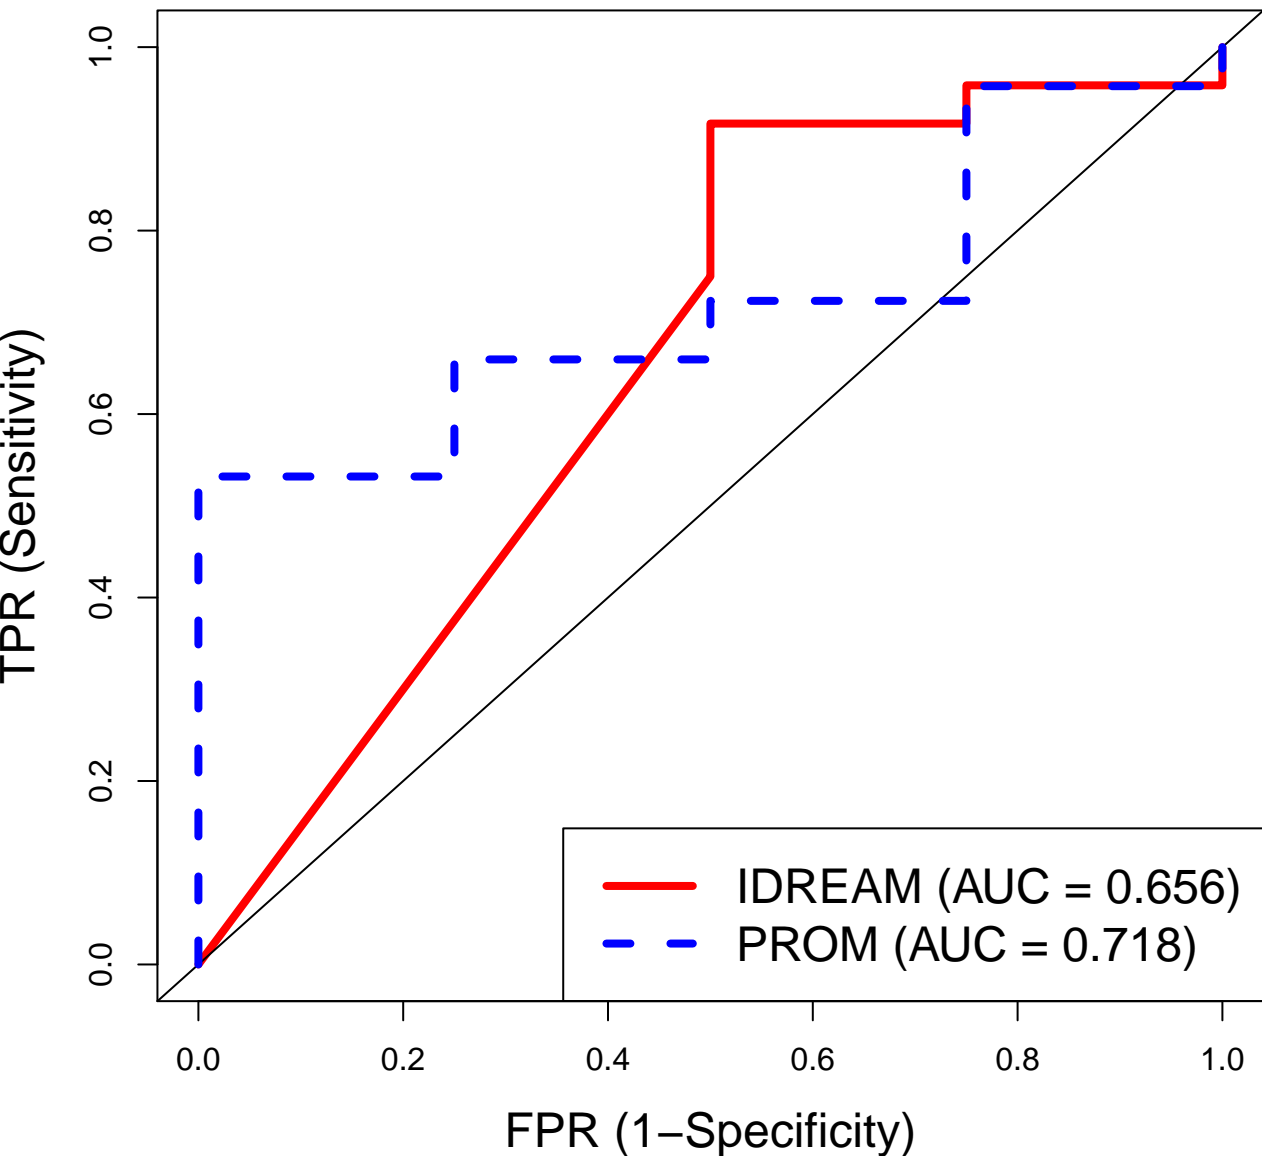

# Predictions from Yeast 6 (Threshold=0.273)

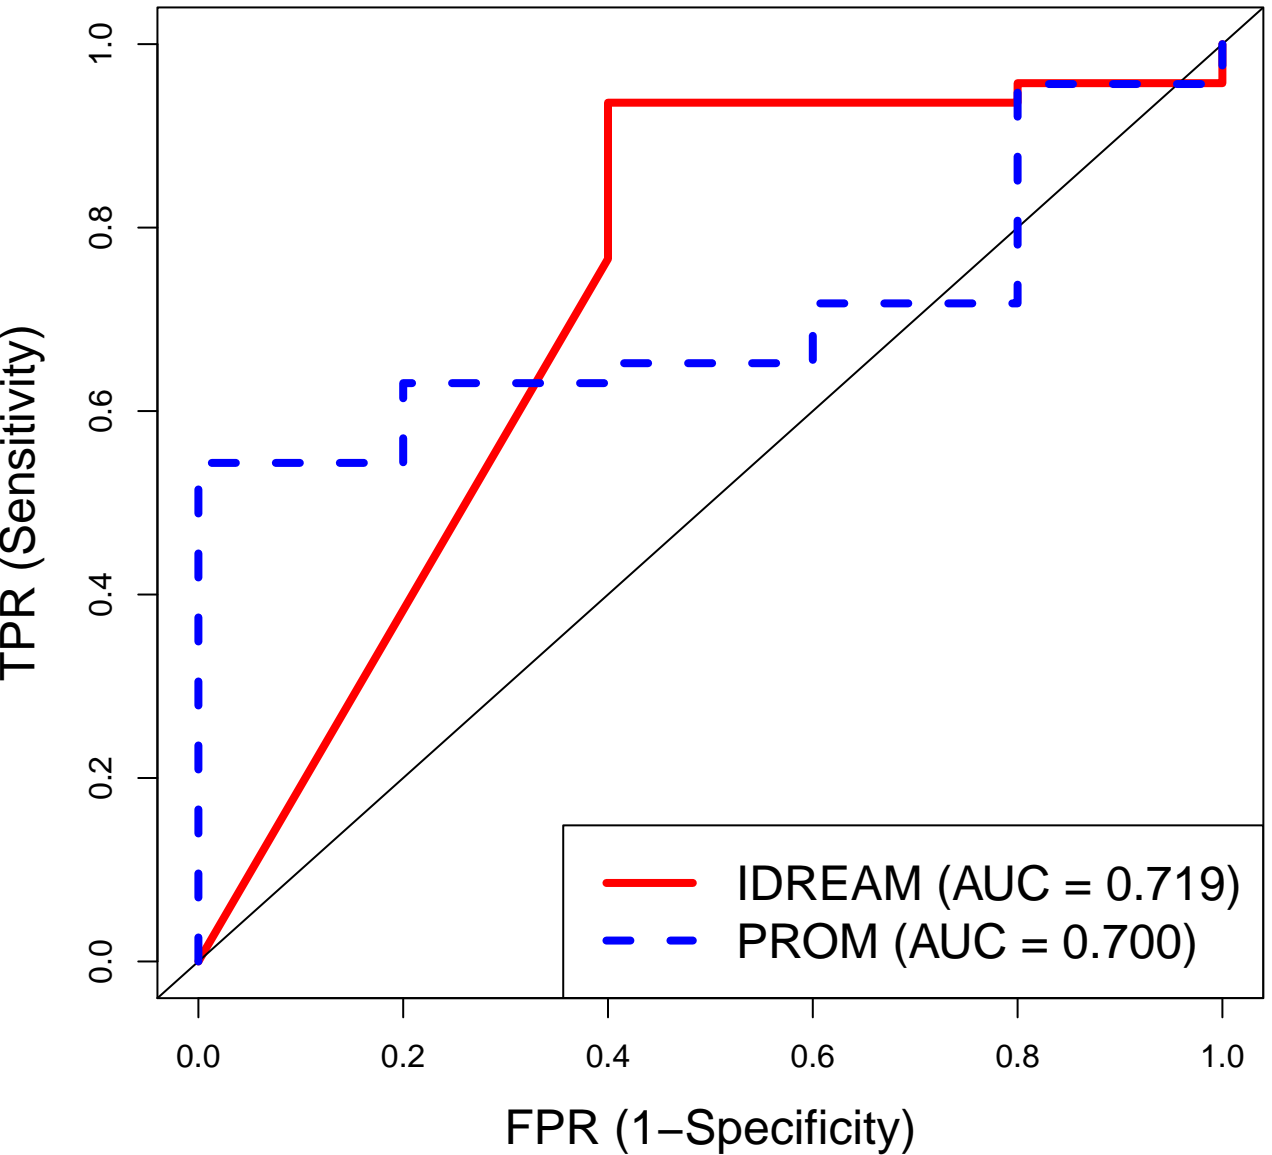

# Predictions from Yeast 6 (Threshold=0.303)

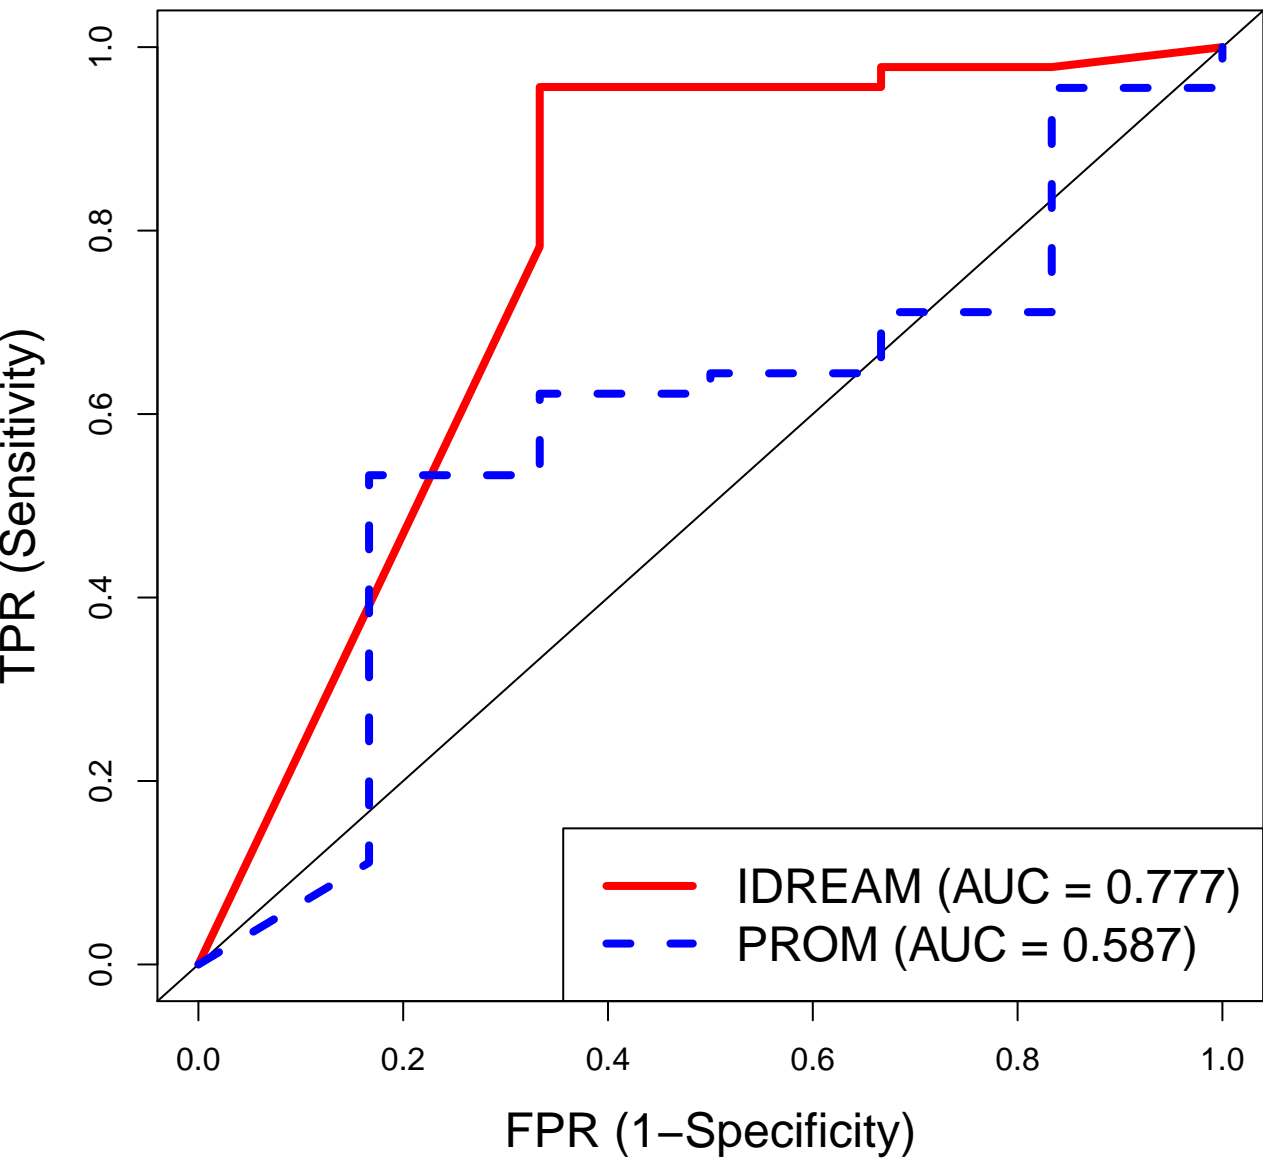

# Predictions from Yeast 6 (Threshold=0.545)

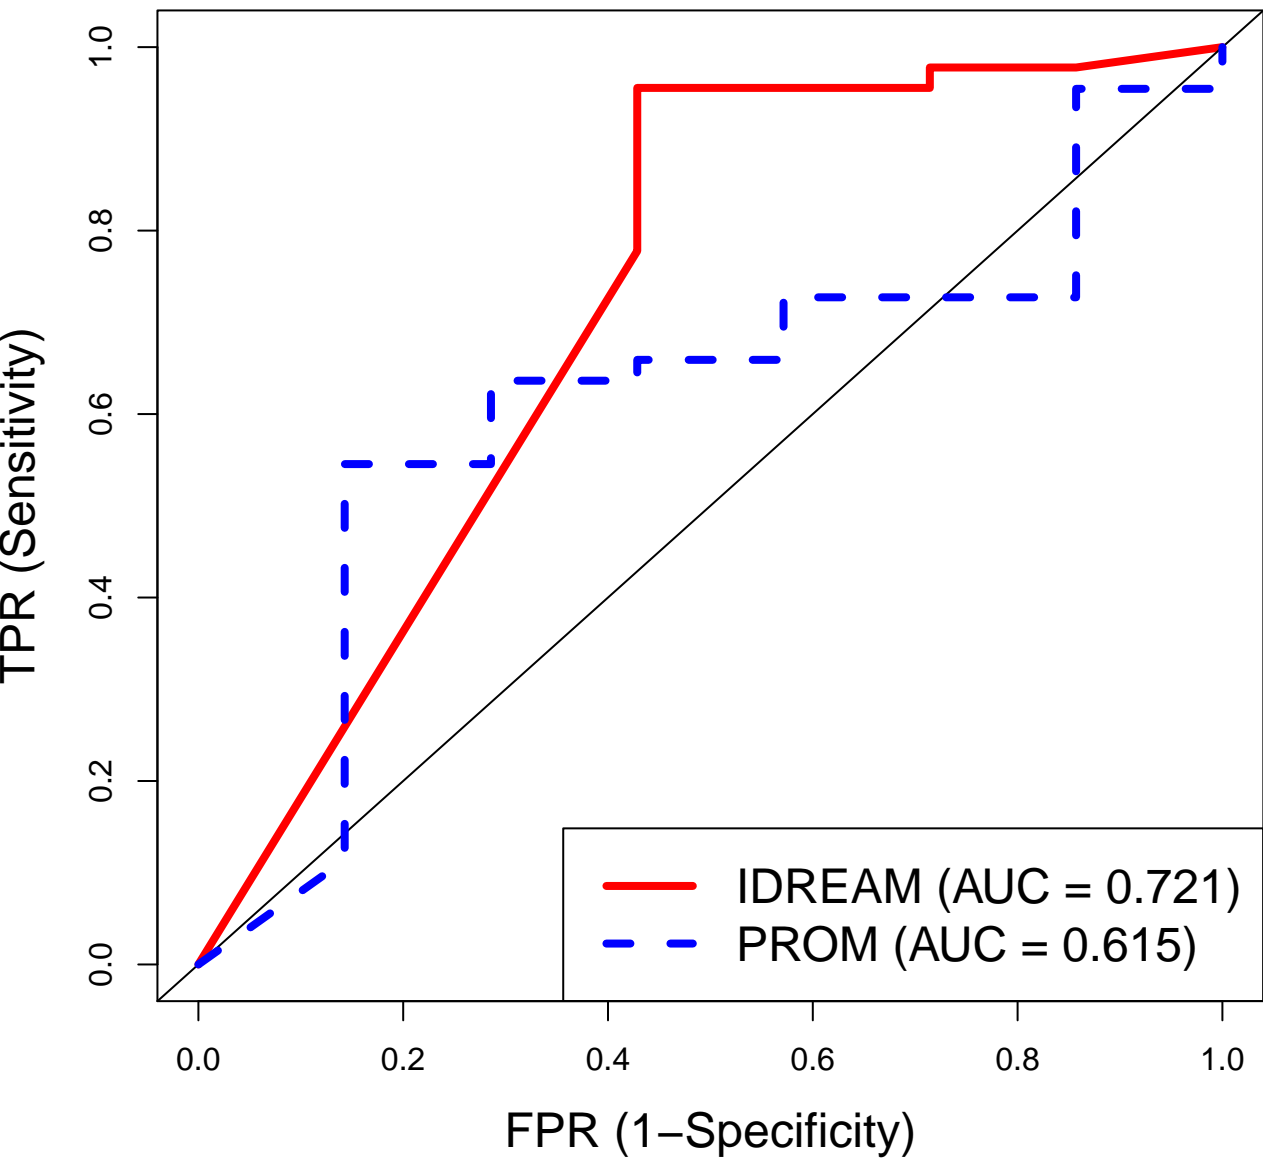

# Predictions from Yeast 6 (Threshold=0.576)

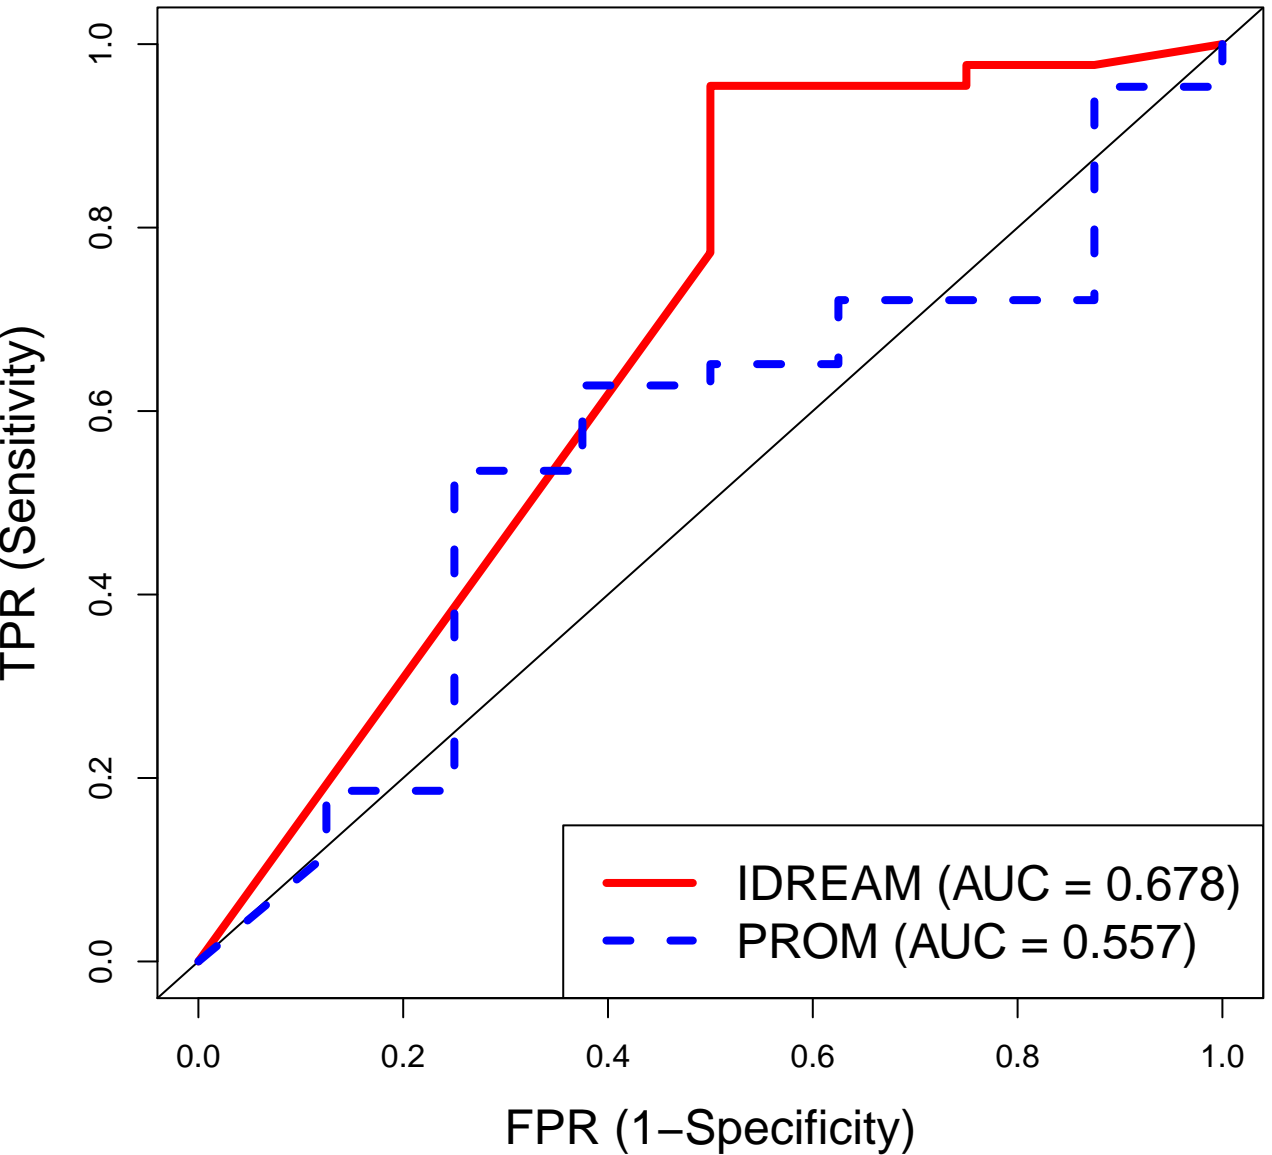

# Predictions from Yeast 6 (Threshold=0.606)

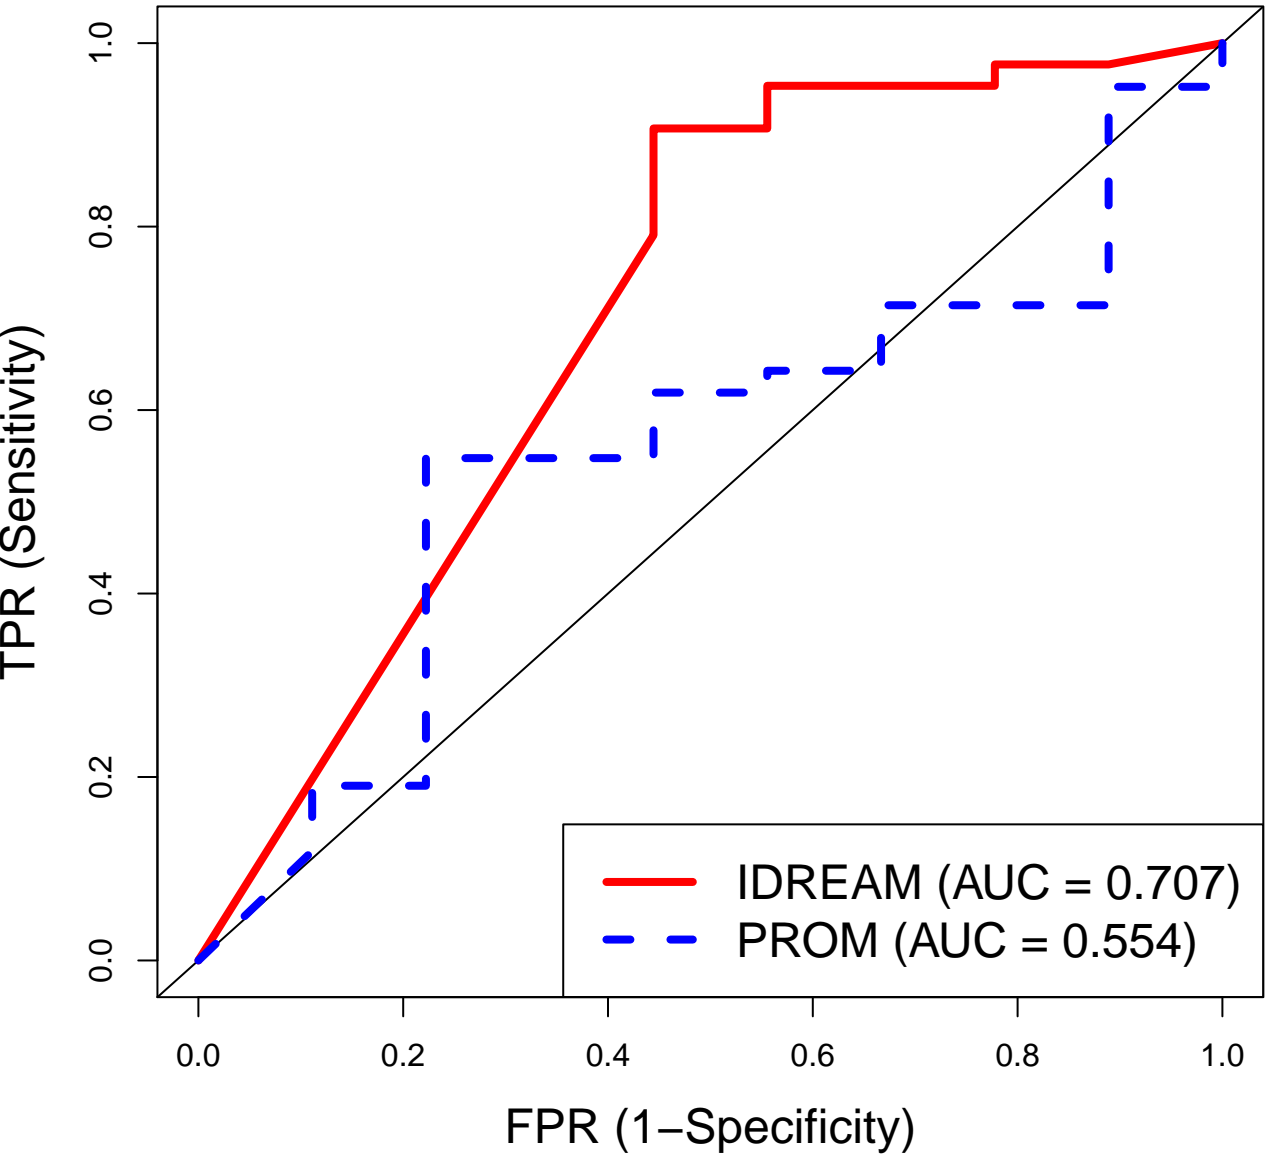



# Predictions from Yeast 6 (Threshold=0.667)

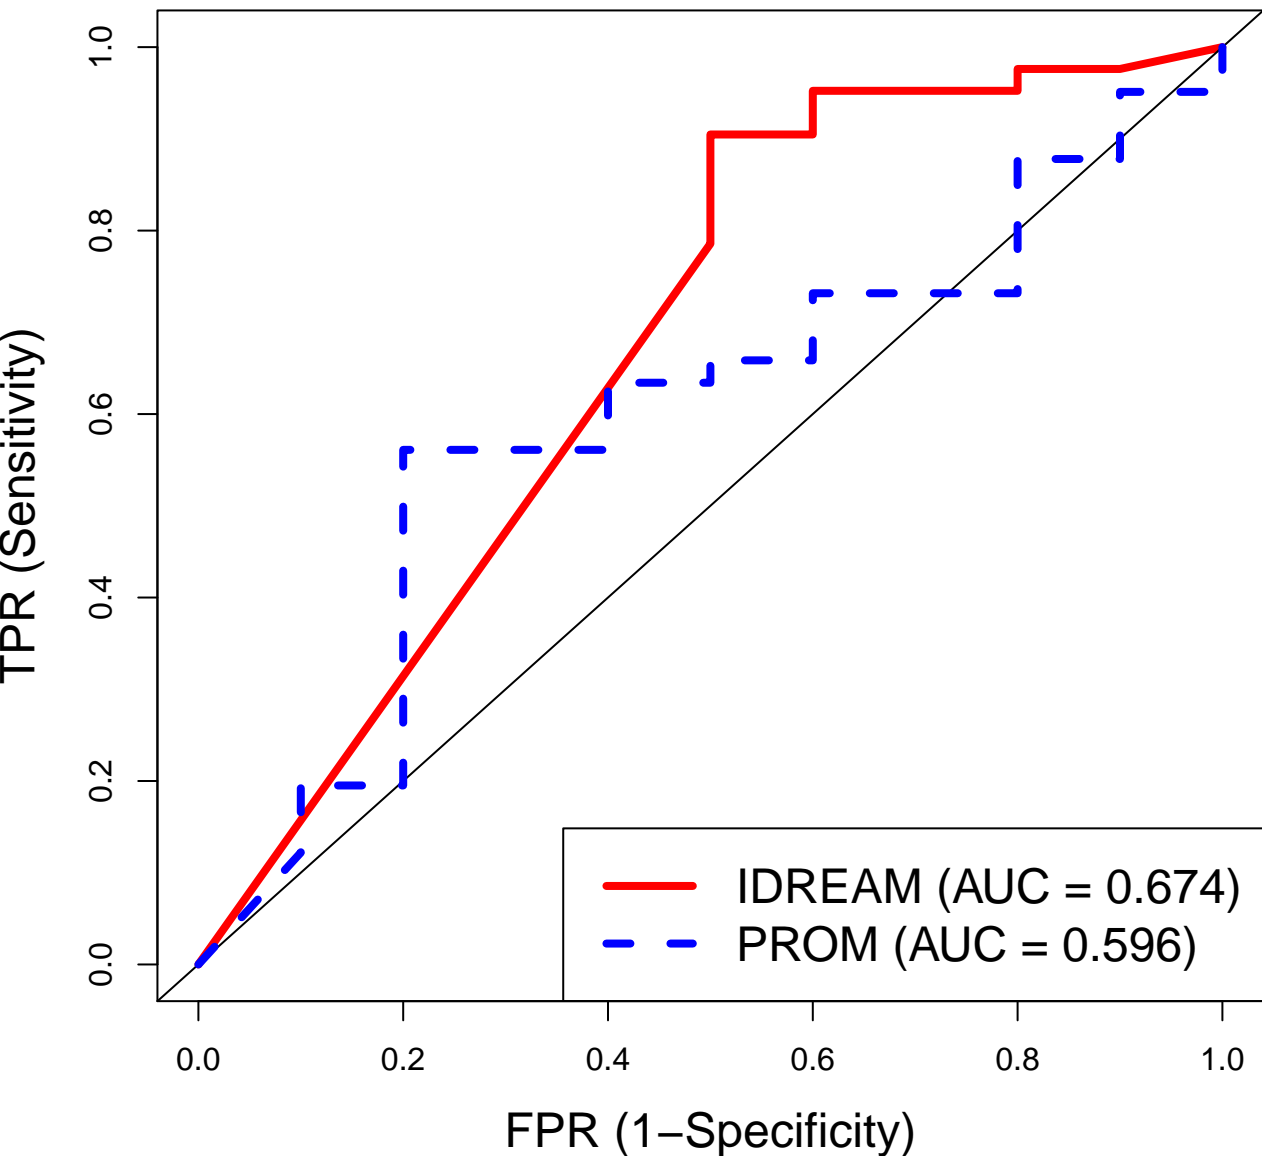

# Predictions from Yeast 6 (Threshold=0.727)

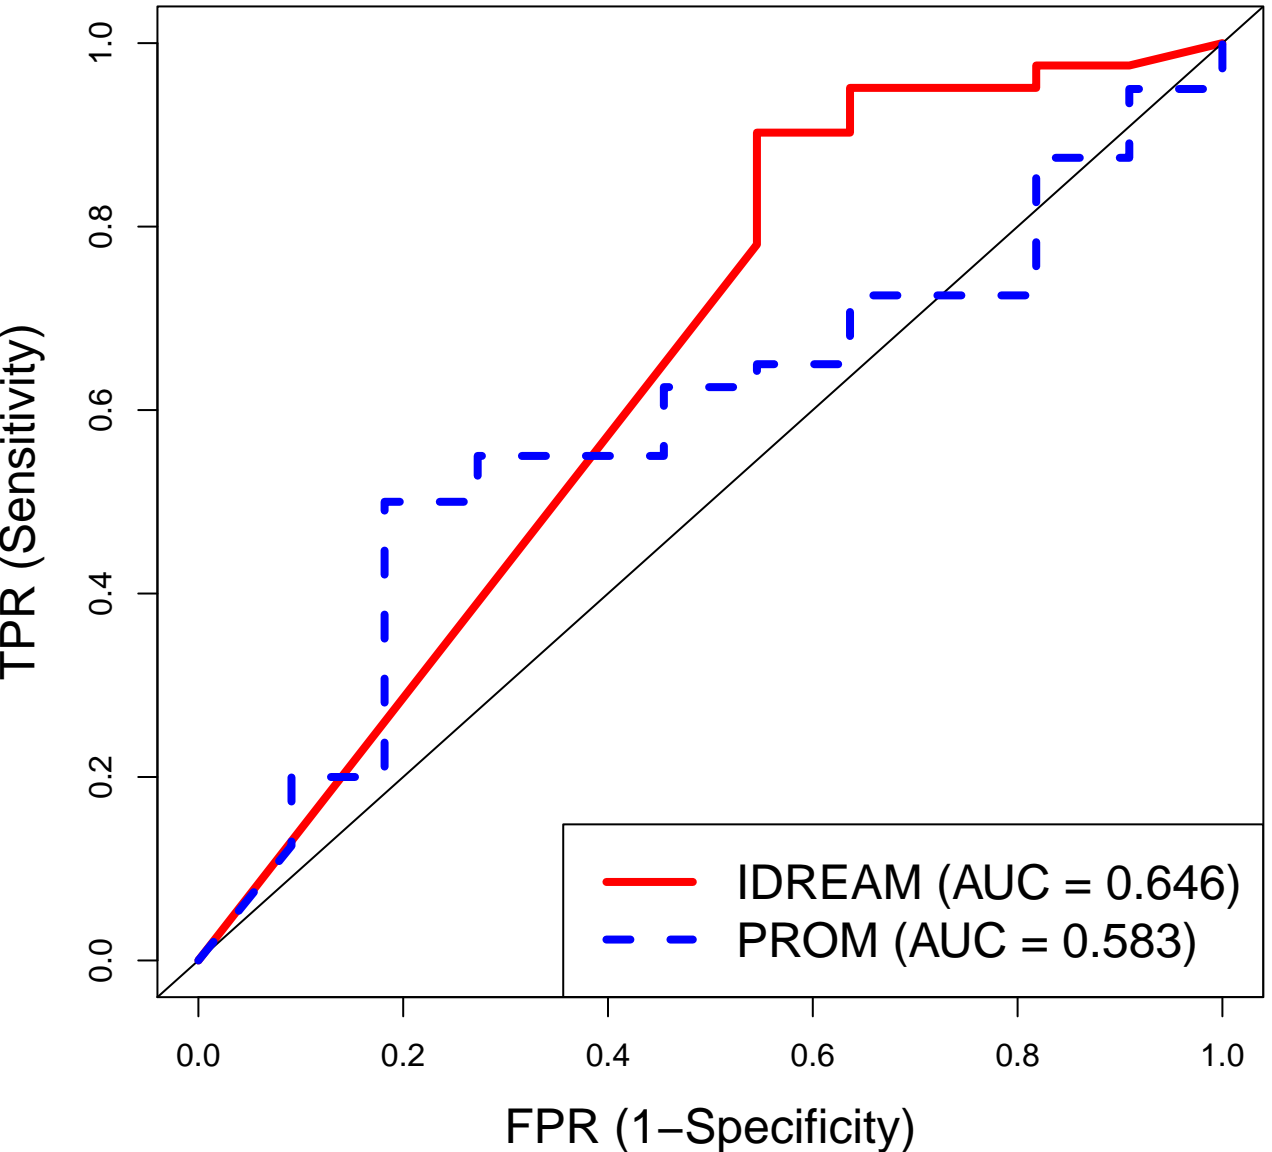

# Predictions from Yeast 6 (Threshold=0.818)

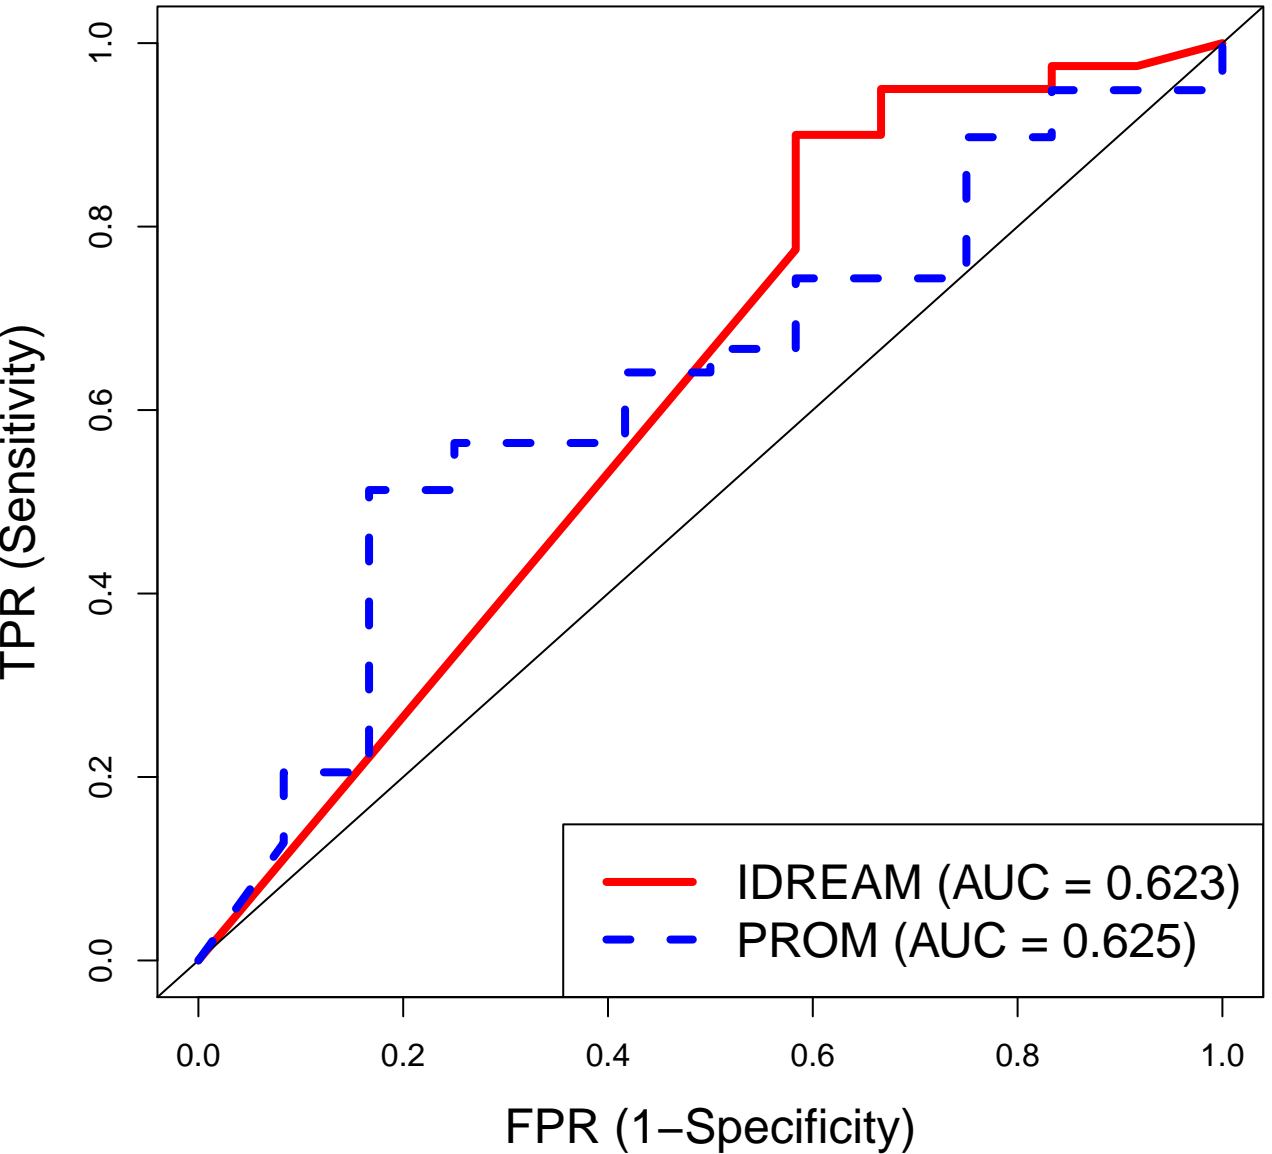

# Predictions from Yeast 6 (Threshold=0.909)

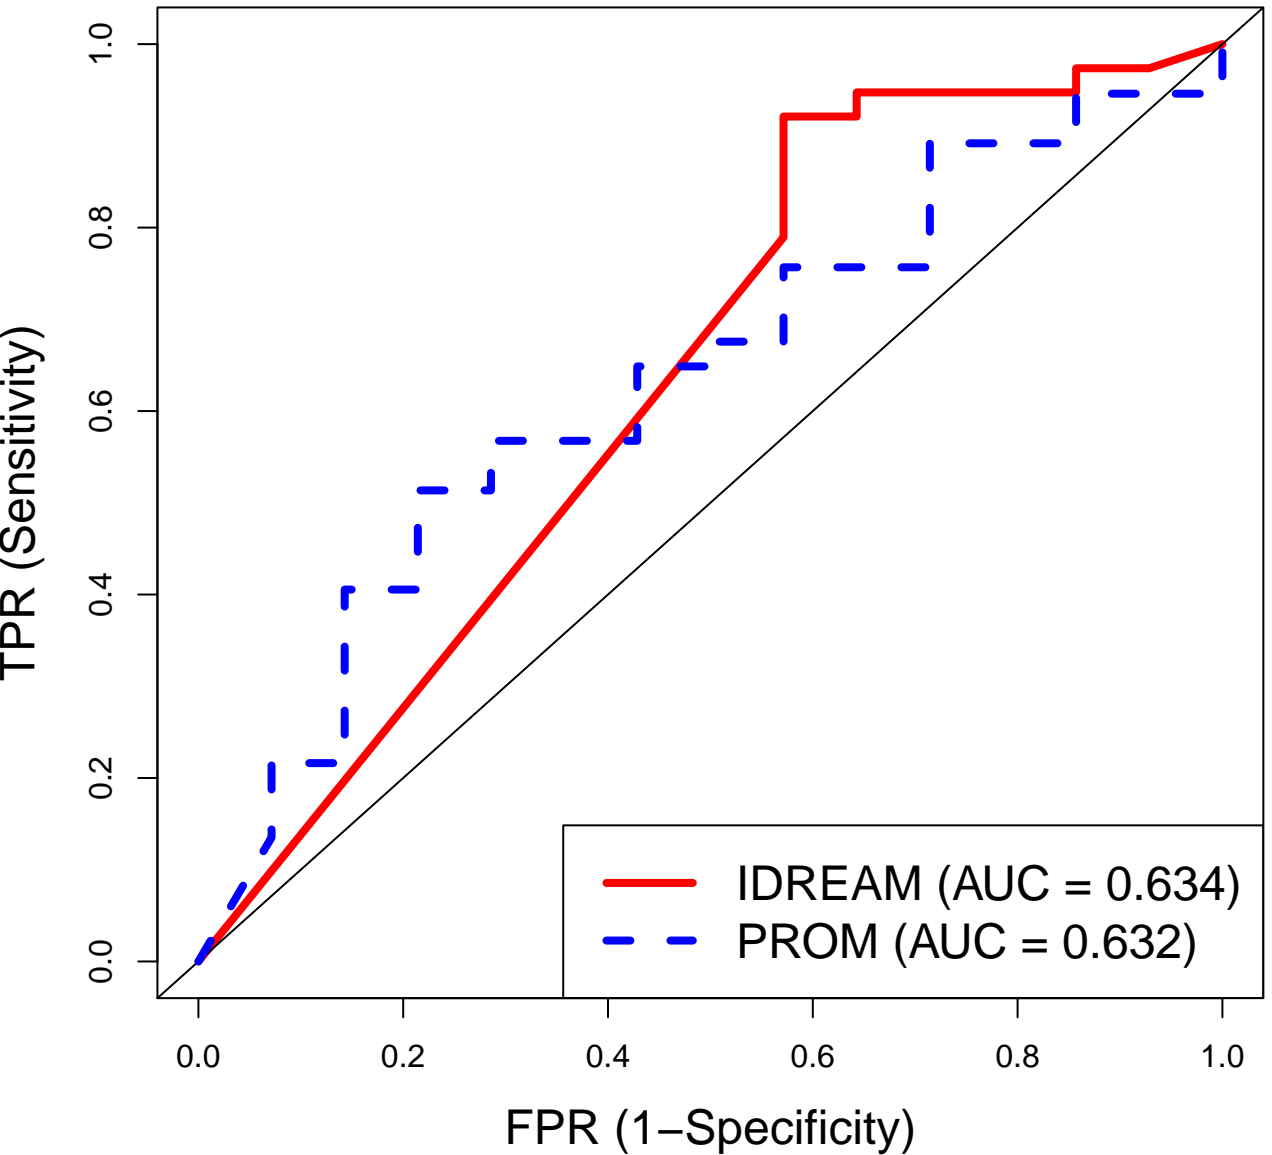

# Predictions from Yeast 6 (Threshold=0.939)

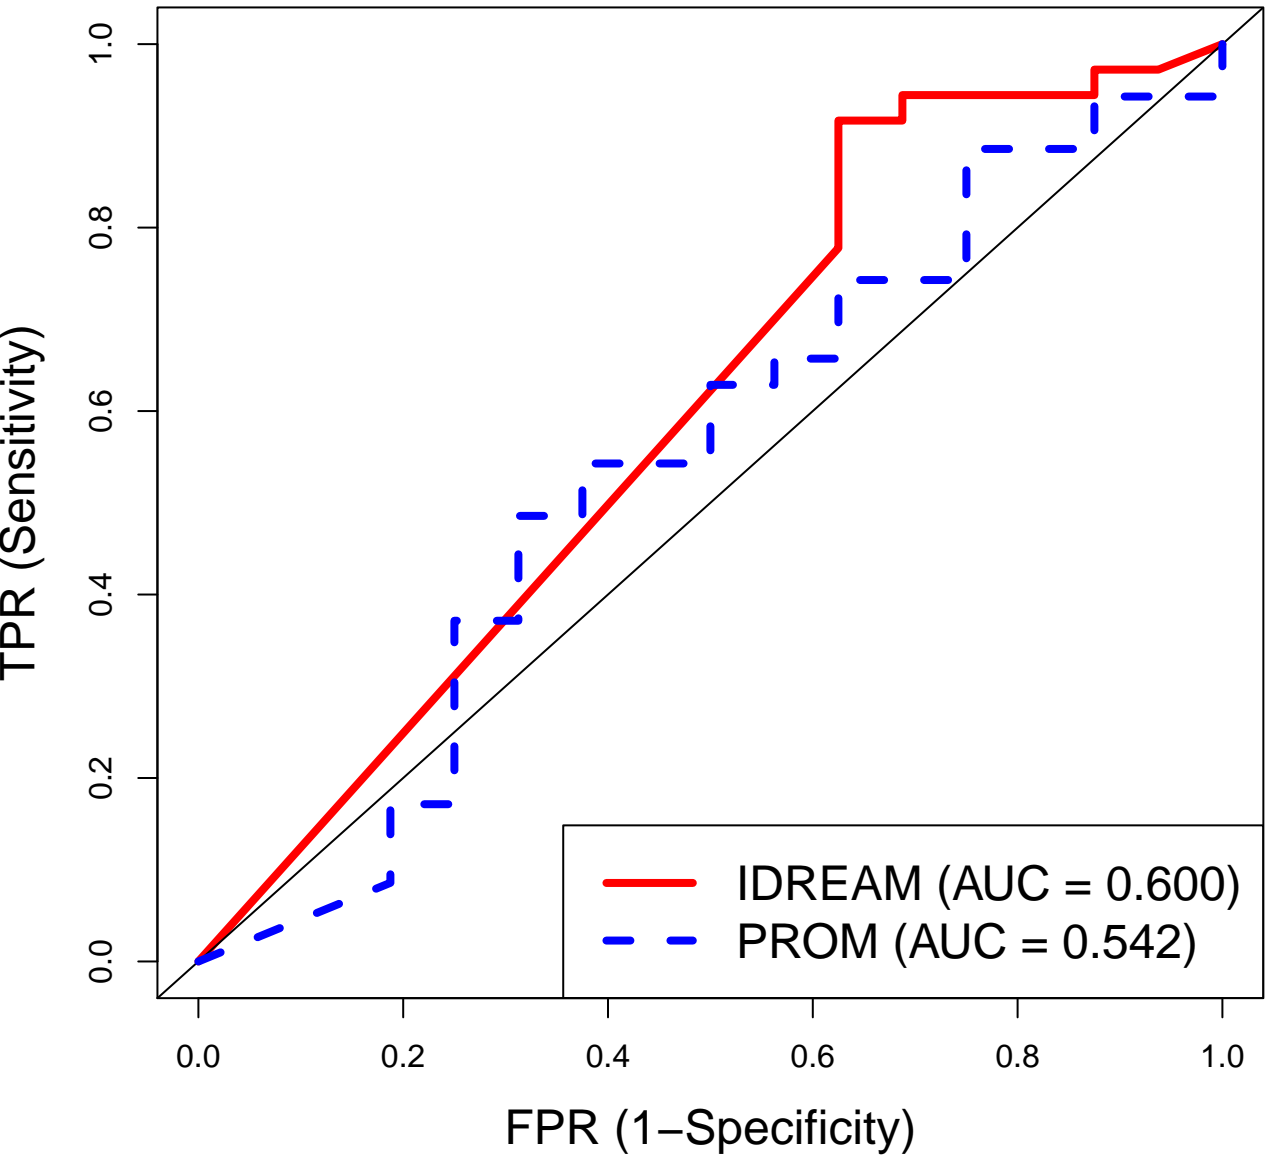

# Predictions from Yeast 6 (Threshold=0.970)

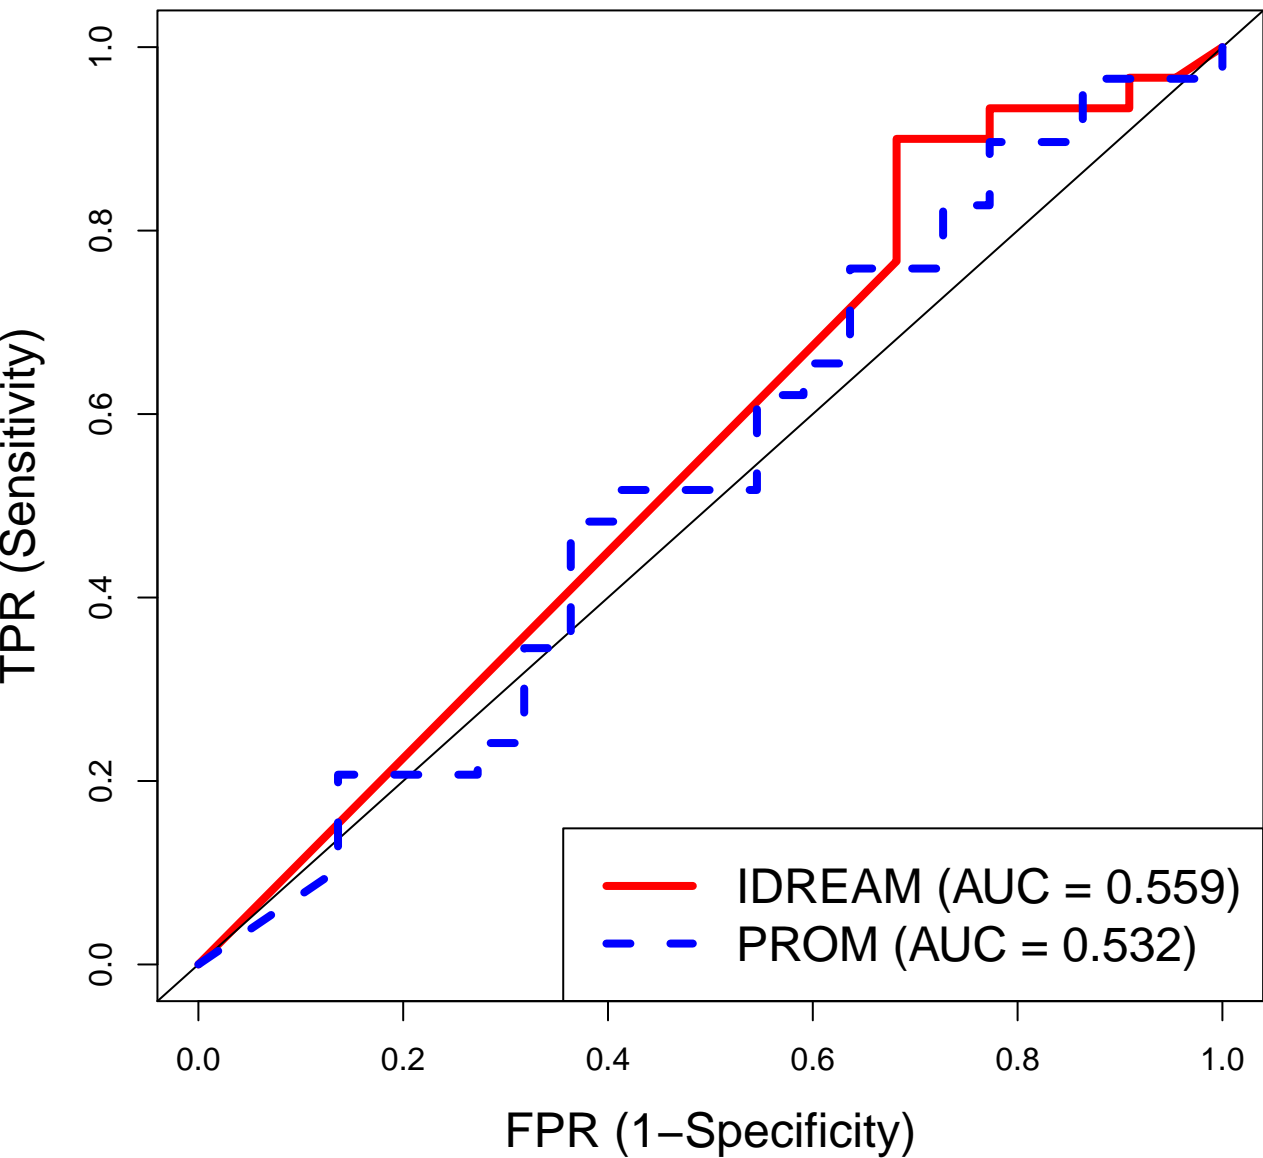

# Predictions from Yeast 6 (Threshold=1.000)

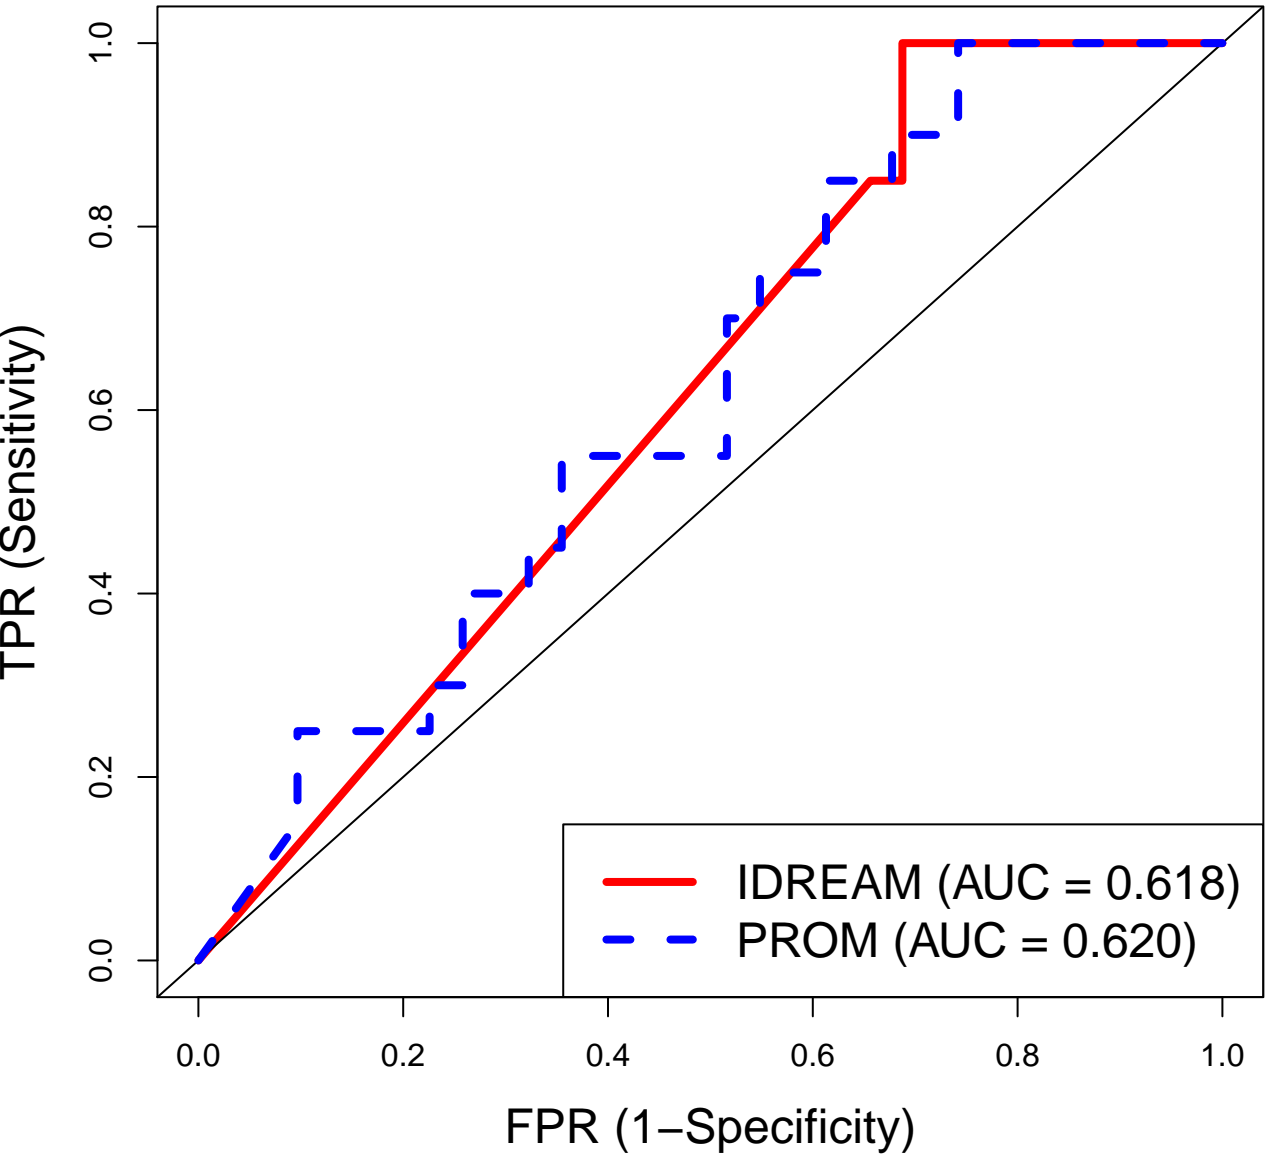

# Predictions from Yeast 6 (Threshold=1.030)

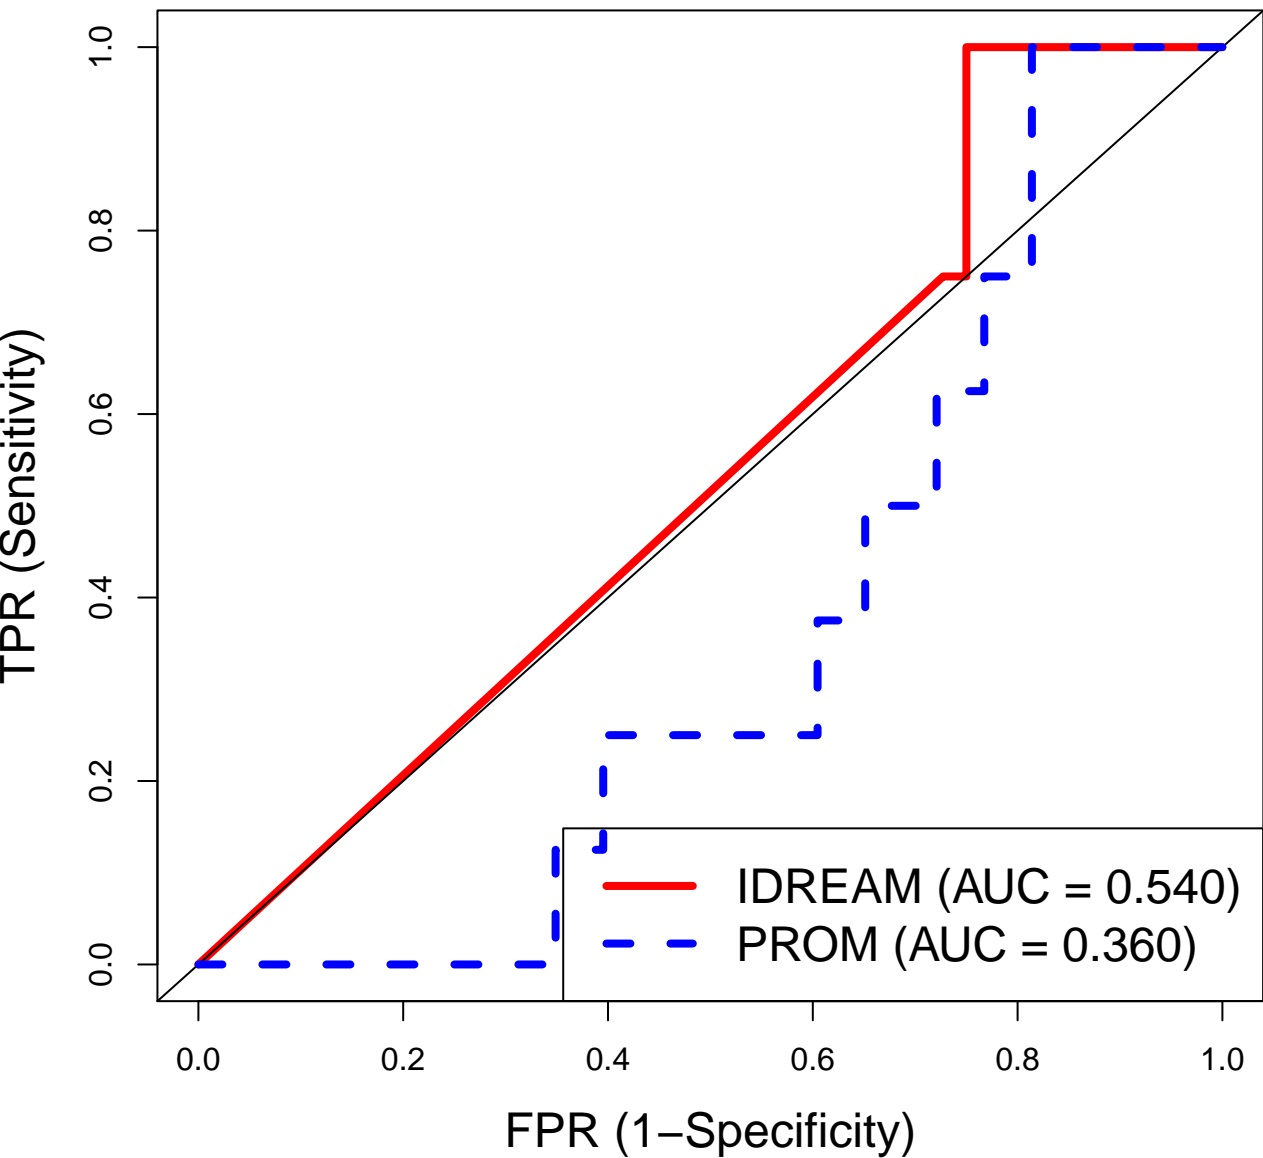

Supplement: pcbi.1005489.s002.pdf [file pcbi.1005489.s002.pdf]
