# Supplementary material for: Combining inferred regulatory and reconstructed metabolic networks enhances phenotype prediction in yeast
Source: PubMed Central journal article supplement (PMC5453602; doi:10.1371/journal.pcbi.1005489), 2017-05-17

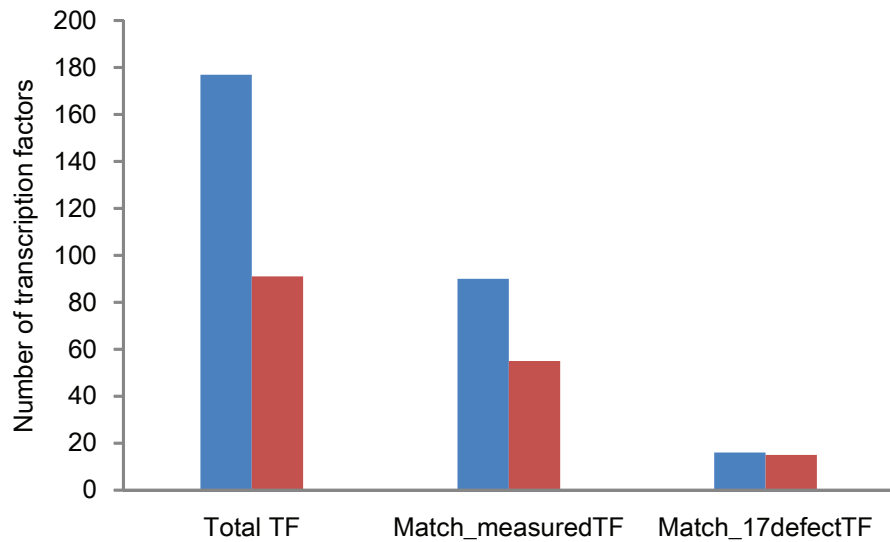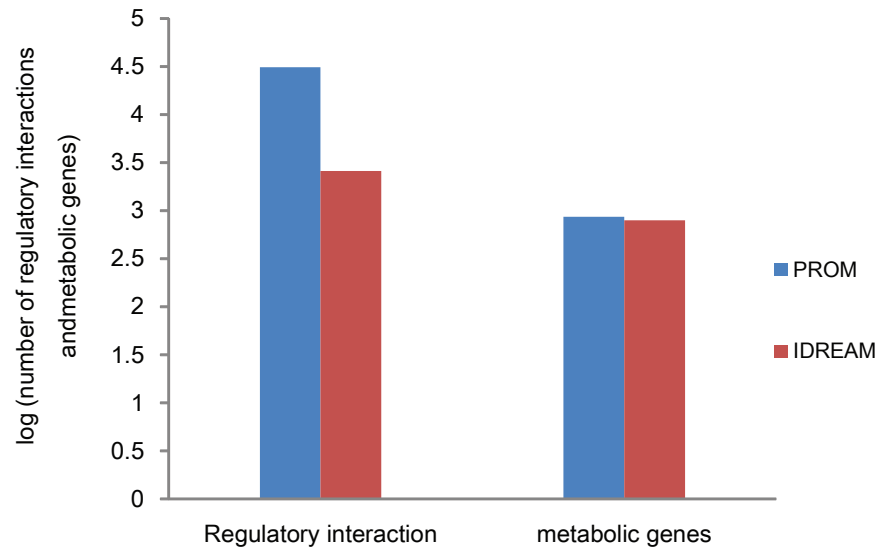

Supplement: pcbi.1005489.s001.pdf [file pcbi.1005489.s001.pdf]
