# Supplementary material for: Combining inferred regulatory and reconstructed metabolic networks enhances phenotype prediction in yeast
Source: PubMed Central journal article supplement (PMC5453602; doi:10.1371/journal.pcbi.1005489), 2017-05-17

YAL051W  
YBL005W  
YBL021C  
YBL103C  
YBR049C  
YBR083W  
YBR182C  
YCL055W  
YCR065W  
YDL058C  
YDL170W  
YDL209W  
YDR034C  
YDR123C  
YDR146C  
YDR207C  
YDR216W  
YDR253C  
YDR259C  
YDR423C  
YEL009C  
YER040W  
YER111C  
YFL021W  
YFL031W  
YFR034C  
YGL013C  
YGL035C  
YGL077W  
YGL113W  
YGL166W  
YGL209W  
YGL237C  
YGL254W  
YGR044C  
YHR084W  
YHR124W  
YHR178W  
YHR206W  
YIL036W  
YIL101C  
YIL131C  
YIR023W  
YJL056C  
YJL089W  
YJL110C  
YJL110C  
YJR060W  
YKJ015C  
YKL038W  
YKL062W  
YKL109W  
YKL112W  
YKL185W  
YKR034W  
YKR064W  
YLR014C  
YLR098C  
YLR131C  
YLR176C  
YLR228C  
YLR256W  
YLR451W  
YML007W  
YML089C  
YMR021C  
YMR031C  
YMR043W  
YMR070W  
YMR280C  
YNL027W  
YNL068C  
YNL103W  
YNL167C  
YNL204C  
YNL216W  
YNL314W  
YOL028C  
YOL067C  
YOL108C  
YOR028C  
YOR140W  
YOR337W  
YOR358W  
YOR475C  
YOR755C  
YPL089C  
YPL248C  
YPR065W  
YPR199C

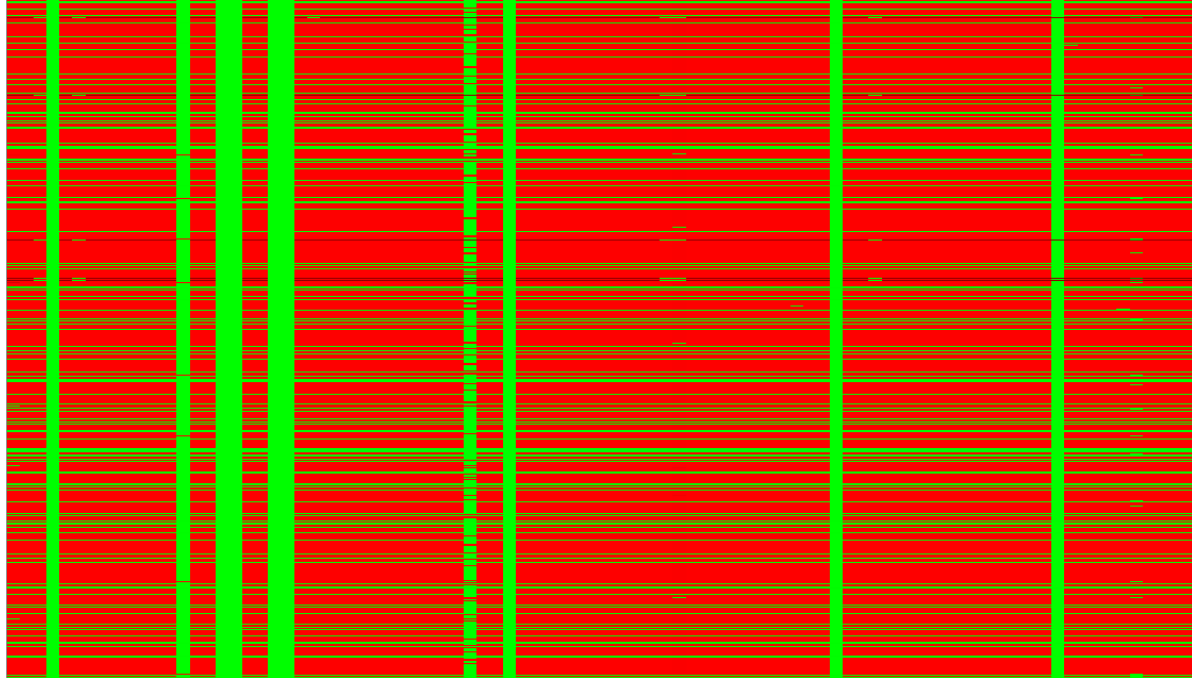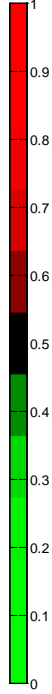

Supplement: pcbi.1005489.s004.pdf [file pcbi.1005489.s004.pdf]
