# Supplementary material for: Combining inferred regulatory and reconstructed metabolic networks enhances phenotype prediction in yeast
Source: PLoS Comput Biol. 2017 May 17;13(5):e1005489. doi: 10.1371/journal.pcbi.1005489 (PMC5453602; doi:10.1371/journal.pcbi.1005489)
Supplement: S3 Table — (XLS) [file pcbi.1005489.s008.xls]

## Sheet: CLR_RegulatoryNetwork
TF	Target gene
YBL005W	YBL005W-A
YCR106W	YCR107W
YCR097W	YGL089C
YCR097W	YJR004C
YML027W	YNL289W
YCR097W	YKL178C
YCL066W	YPL187W
YCL066W	YCR097W
YML027W	YMR199W
YCL066W	YGL089C
YCR097W	YPL187W
YCL066W	YKL178C
YCL066W	YJR004C
YOL028C	YOL029C
YCL066W	YLR040C
YIR017C	YLR092W
YDR146C	YBR038W
YDR146C	YJR092W
YLR131C	YOR025W
YDR034C	YDR034C-A
YDR146C	YMR032W
YCR097W	YLR040C
YLR136C	YHL040C
YOR083W	YER153C
YDR146C	YOR025W
YDR451C	YNL289W
YDR253C	YDL059C
YDR253C	YHL036W
YGR044C	YBR157C
YML113W	YNL299W
YIR017C	YFR030W
YDR253C	YNL277W
YBR010W	YDR224C
YBR010W	YBR009C
YDR146C	YMR001C
YDR253C	YKR069W
YCL066W	YKL209C
YDR146C	YGL021W
YDR146C	YLR190W
YDR448W	YDL156W
YKL185W	YNL327W
YCR106W	YCR105W
YOR315W	YDR146C
YGL192W	YJR086W
YIR017C	YDL059C
YKR034W	YNL142W
YCL066W	YFL026W
YNL309W	YKR077W
YJL168C	YIL130W
YBR240C	YLR004C
YDR451C	YML027W
YBL008W	YBL008W-A
YOR315W	YOR313C
YKL185W	YKL164C
YCR106W	YDR539W
YDR451C	YMR199W
YGL192W	YBL016W
YML027W	YDR507C
YML027W	YHR061C
YER164W	YIL126W
YMR179W	YPL153C
YDR253C	YLR092W
YPL082C	YEL032W
YOL067C	YGR006W
YBR202W	YBL023C
YIR017C	YKL001C
YLR131C	YJR092W
YIR017C	YJR137C
YML027W	YGR221C
YNR063W	YOL141W
YDR146C	YPL141C
YGL192W	YOR212W
YIR017C	YKR069W
YCL066W	YNL145W
YDR146C	YMR030W-A
YBR202W	YEL032W
YML027W	YDL003W
YML027W	YNL300W
YIR017C	YNL277W
YER111C	YBR275C
YOL067C	YBL074C
YCR018C	YAR010C
YDR146C	YPR119W
YNL309W	YBL010C
YML027W	YPL256C
YPR018W	YKL113C
YGL192W	YGR295C
YDR277C	YNL144C
YML027W	YNR009W
YCL066W	YIL015W
YIR017C	YEL072W
YDR451C	YNR009W
YDR146C	YNL327W
YLR136C	YOR382W
YCR097W	YGR109W-A
YOR372C	YJL092W
YCL066W	YGR109W-A
YJR017C	YCL028W
YIL119C	YHL028W
YOR315W	YBR038W
YDR451C	YBL031W
YML027W	YER070W
YHR124W	YKL178C
YDR146C	YAR018C
YER184C	YJR106W
YIR017C	YDR253C
YJR140C	YLL021W
YLR131C	YDR146C
YLR223C	YNL201C
YDR253C	YKL001C
YGL192W	YHR005C
YMR280C	YMR206W
YCR018C	YBR157C
YCL055W	YCL027W
YPL128C	YOR204W
YCR065W	YHR061C
YCR018C	YGR295C
YLR136C	YOR383C
YGL192W	YLR265C
YMR179W	YJL073W
YNL309W	YOR114W
YCR018C	YOL104C
YLR182W	YDR356W
YNL309W	YFR027W
YDR451C	YPL124W
YBR240C	YOL055C
YLR131C	YMR001C
YDR253C	YPR167C
YHR124W	YNL012W
YGR044C	YDL227C
YGR044C	YLR265C
YMR179W	YNL273W
YKL185W	YNR067C
YKL185W	YDL179W
YGL192W	YDR261C-D
YML027W	YOR373W
YDR253C	YJR010W
YML027W	YPL255W
YMR179W	YNL082W
YML027W	YDL211C
YGL192W	YLR466C-B
YOR290C	YPL085W
YOR315W	YGR108W
YPL082C	YDR420W
YDR397C	YDR182W
YOR315W	YGR041W
YKL185W	YGL028C
YLR131C	YLR190W
YGL192W	YJL157C
YBR010W	YDR225W
YOR315W	YPR119W
YMR280C	YGL146C
YMR179W	YPL267W
YIR017C	YJR010W
YDR451C	YGR221C
YCR097W	YNL279W
YDR253C	YEL072W
YML027W	YBR088C
YKR099W	YML082W
YHR124W	YNL202W
YDR146C	YBR138C
YML113W	YGR079W
YOR290C	YOR181W
YCR018C	YDR103W
YNL309W	YML109W
YGL192W	YDR103W
YCR018C	YDL231C
YBR267W	YKR056W
YBL054W	YOR145C
YCL066W	YHR005C
YDR277C	YPR030W
YDR277C	YKR075C
YLR131C	YMR032W
YMR280C	YPR030W
YLR223C	YPL082C
YER045C	YLR155C
YDR451C	YHR061C
YOR315W	YGL028C
YCR018C	YLR466C-B
YLR131C	YPL155C
YGL192W	YAR010C
YJL089W	YLR307C-A
YML027W	YGR109C
YIR017C	YPR167C
YER045C	YLR156W
YNL309W	YKL108W
YIR017C	YGL184C
YIR033W	YOL101C
YGL192W	YDR316W-B
YOR315W	YGR109C
YPR018W	YNL273W
YDR397C	YHR007C-A
YPR054W	YCL026C-A
YCL066W	YDR461W
YDR146C	YOR058C
YPR031W	YGR188C
YGR044C	YGR109W-A
YDR146C	YJL092W
YGL192W	YLR452C
YCR065W	YAL024C
YBR112C	YCR077C
YDR146C	YPL158C
YML027W	YLR084C
YGL192W	YCR018C
YML027W	YJL194W
YMR280C	YDL079C
YNR063W	YDR014W
YDR451C	YJL187C
YDR397C	YHR007C
YCR018C	YOR212W
YLR136C	YOR384W
YCL066W	YGL032C
YOR140W	YNL278W
YLR131C	YGL116W
YLR131C	YPL141C
YGL192W	YDL231C
YOR315W	YIL158W
YCR018C	YBL016W
YML027W	YLR183C
YDR277C	YDL079C
YNL031C	YBR009C
YOR140W	YDR232W
YKR034W	YIR029W
YOR083W	YER154W
YDR146C	YGL116W
YBR112C	YNL278W
YOR315W	YHR061C
YCL066W	YBL016W
YGL192W	YDR261W-B
YDR277C	YMR081C
YCL066W	YJR086W
YMR179W	YCL024W
YCR018C	YCL021W-A
YCR018C	YJR086W
YCR018C	YLR265C
YLR453C	YMR063W
YBR267W	YML080W
YOR290C	YOL004W
YLR182W	YOR017W
YDR451C	YDR501W
YBR202W	YBR112C
YBR202W	YOR373W
YJL127C	YMR063W
YLR182W	YGR188C
YOR140W	YPL082C
YNL132W	YBL039C
YDR496C	YKR081C
YLR131C	YBR138C
YFL031W	YNL190W
YCL066W	YJL157C
YDR310C	YIL126W
YGL192W	YGR044C
YOL004W	YPL085W
YGR044C	YKL178C
YPR104C	YER114C
YDR296W	YJL063C
YOR140W	YDR464W
YDR253C	YGL184C
YMR042W	YDR232W
YPL082C	YHR099W
YCR096C	YCR097W
YGL192W	YDR261C
YCR018C	YHR005C
YCL066W	YOR212W
YER111C	YPL194W
YLR182W	YAL034W-A
YBR010W	YBL003C
YGL192W	YOL164W
YNL309W	YIL026C
YMR280C	YDL214C
YLR131C	YOR083W
YGR067C	YIL057C
YFL021W	YGL125W
YCL055W	YNL279W
YNL132W	YMR049C
YBR182C	YBR182C-A
YER045C	YLR157W-C
YPL016W	YIL126W
YNL031C	YBL003C
YGR067C	YKL217W
YDR146C	YIL158W
YCL066W	YNL279W
YPR018W	YMR179W
YER111C	YDR359C
YDR146C	YGR108W
YBR240C	YIR028W
YOR315W	YOR025W
YKL185W	YPL158C
YIR017C	YHL036W
YMR179W	YKL108W
YGR044C	YJL157C
YGL192W	YLR040C
YCR018C	YJL157C
YPL082C	YPR104C
YPL082C	YJR066W
YCR106W	YIL014C-A
YPL082C	YIL126W
YBR202W	YPL082C
YNL309W	YPL153C
YLR136C	YMR251W
YMR280C	YPL201C
YDR496C	YIL091C
YDR146C	YNL058C
YML027W	YJL187C
YDR496C	YHR052W
YNL309W	YLR312C-B
YCR018C	YGR044C
YDR277C	YBR203W
YFL031W	YPL067C
YER028C	YHR094C
YDR451C	YDL003W
YOL067C	YMR063W
YDR146C	YMR001C-A
YBR112C	YPL085W
YDR451C	YOR247W
YDR034C	YGL192W
YMR280C	YDL085W
YGR067C	YJR095W
YGL192W	YPR122W
YIR017C	YBR294W
YDR296W	YDR337W
YOR315W	YLR190W
YKR034W	YIR032C
YGR067C	YLR174W
YGR288W	YGR289C
YDR296W	YPL173W
YML113W	YPL068C
YML010W	YIL022W
YDR451C	YPL127C
YDL056W	YDR159W
YPR104C	YDR464W
YDR253C	YFR030W
YML027W	YJL181W
YCL066W	YCL027W
YGL192W	YAR009C
YDR496C	YGL078C
YOR229W	YKL068W
YOR083W	YJR092W
YBL054W	YDR184C
YOL004W	YIR006C
YGR044C	YLR040C
YDR496C	YML093W
YFL031W	YDR389W
YBR240C	YIR027C
YGR067C	YIL162W
YHR124W	YLR031W
YDR451C	YJL092W
YDR451C	YLR045C
YCR018C	YOL164W
YIR017C	YLL055W
YNR063W	YDR243C
YNL132W	YMR229C
YJL176C	YEL061C
YJL168C	YPR104C
YJL127C	YJL127C-B
YLR182W	YEL061C
YBR083W	YDL227C
YBR083W	YNL279W
YDR397C	YDR182W-A
YKR099W	YER137C
YJL089W	YER024W
YDR253C	YLL062C
YBR267W	YOR145C
YOR083W	YJR053W
YOL067C	YBR152W
YOR140W	YAR027W
YIR023W	YIL130W
YIL119C	YBL029W
YMR280C	YKL217W
YDR496C	YGL029W
YLR131C	YOR313C
YPL016W	YPL082C
YJL127C	YDR437W
YKR034W	YJR152W
YBR083W	YBR157C
YDR009W	YFR055W
YOR229W	YMR042W
YCL055W	YNR044W
YOR290C	YOR083W
YOR315W	YJR092W
YMR280C	YMR081C
YNL132W	YOR341W
YGR044C	YHR005C
YIR017C	YBR213W
YOR140W	YDR420W
YGL192W	YBL029W
YDR448W	YKR086W
YCR018C	YCL027W
YCL066W	YAR009C
YOR315W	YPL255W
YOR315W	YMR001C
YGL192W	YGR109W-A
YMR179W	YIL026C
YOR140W	YBR112C
YMR280C	YIL057C
YOR229W	YKL068W-A
YGR067C	YPL200W
YGR044C	YBL016W
YBR267W	YKR024C
YOL067C	YKL095W
YBR267W	YHR066W
YJR017C	YCL008C
YIL084C	YBR065C
YML027W	YGR014W
YDR496C	YOL080C
YOR162C	YOR161C-C
YPL082C	YDR464W
YPR196W	YKR103W
YOR315W	YBL002W
YCL066W	YNR044W
YOL067C	YDL087C
YJR127C	YER098W
YDR496C	YDL060W
YLR131C	YOR058C
YPR018W	YNL233W
YGL192W	YOR346W
YPL082C	YJL074C
YKR034W	YDR046C
YLR182W	YDL240W
YML027W	YGR108W
YBR112C	YPL269W
YGL151W	YMR061W
YLR131C	YBR038W
YBL005W	YAR010C
YDR213W	YJR150C
YDR146C	YJL078C
YDR496C	YCR057C
YDR451C	YPL255W
YOR290C	YGL023C
YMR280C	YDL194W
YNR063W	YMR063W
YPL230W	YNL194C
YLR131C	YMR001C-A
YGR067C	YNR002C
YBR297W	YER015W
YGL192W	YDR012W
YLR223C	YKR099W
YOR229W	YEL032W
YNL309W	YKL045W
YLR136C	YDR270W
YMR075W	YDR179C
YOR064C	YPL189C-A
YDR146C	YIL106W
YCR065W	YJL194W
YCR018C	YDR261C-D
YCR018C	YDR261W-B
YDR496C	YNL002C
YKL185W	YMR030W-A
YCR018C	YDR316W-B
YPR018W	YOL006C
YIL131C	YOR073W
YDR081C	YBL104C
YOR315W	YNL327W
YMR280C	YJL002C
YNL132W	YPR010C
YDR310C	YBR112C
YDR310C	YDR464W
YDR451C	YJL194W
YCL066W	YGL192W
YBL054W	YBR271W
YPL082C	YLR087C
YJL168C	YOL006C
YBR267W	YJL122W
YOR229W	YOR066W
YBR202W	YGR014W
YBR202W	YCR077C
YNL309W	YJL194W
YNL132W	YMR131C
YDR496C	YNL110C
YDR496C	YDR083W
YLR131C	YGL021W
YPR015C	YDR523C
YDR496C	YHR196W
YNL257C	YBR004C
YDR146C	YBL031W
YNL132W	YDL060W
YPL016W	YEL032W
YJL168C	YJL197W
YOR290C	YKL204W
YIL131C	YER032W
YGL192W	YOR394C-A
YNL132W	YOL077C
YDR296W	YCR046C
YOR140W	YBL066C
YKL185W	YGL116W
YBR240C	YNR056C
YDR496C	YMR239C
YBR049C	YIL126W
YOR290C	YBR112C
YJL089W	YOR100C
YCR106W	YLL010C
YDR277C	YDL194W
YLR453C	YMR094W
YIL101C	YFR017C
YBR083W	YJL157C
YKL185W	YJL078C
YGL192W	YBR157C
YDR146C	YNR067C
YGL192W	YBR073W
YDR169C	YDR169C-A
YCL066W	YNL146C-A
YOR315W	YMR032W
YKR034W	YIR027C
YLR256W	YOL078W
YMR042W	YDR371W
YJL168C	YKR010C
YBR033W	YDR345C
YOR083W	YKR054C
YOR315W	YGL021W
YKL185W	YMR032W
YPL082C	YBL104C
YGR044C	YAR010C
YIR023W	YDR081C
YER028C	YDR345C
YDR423C	YNL111C
YNL132W	YLR196W
YGR044C	YJR086W
YGR044C	YDR103W
YDR496C	YPL043W
YKR034W	YIR028W
YNL132W	YOR272W
YDL170W	YGL117W
YJR127C	YCL030C
YPL082C	YGR217W
YDR496C	YJL148W
YPL016W	YDR464W
YOR140W	YAL011W
YDR223W	YMR175W
YML027W	YKR077W
YDR451C	YLR183C
YOR290C	YOR084W
YMR280C	YFR055W
YML027W	YOL007C
YML027W	YJR030C
YPR104C	YIL009W
YIR017C	YCL064C
YJL089W	YPR001W
YNL132W	YHR089C
YOL004W	YBR112C
YDR296W	YDR462W
YOR038C	YOR233W
YOR315W	YJL194W
YKR034W	YLR004C
YHR124W	YIL117C
YMR280C	YFL030W
YDR146C	YOR313C
YCR065W	YML027W
YLR136C	YHL035C
YIL101C	YLR149C
YMR280C	YNR002C
YGL192W	YNR044W
YNL132W	YMR290C
YML113W	YJR097W
YBL005W	YER064C
YPL230W	YPL186C
YOR140W	YIL117C
YCR018C	YDL012C
YDR496C	YIL096C
YDR451C	YDL101C
YBR112C	YDR042C
YDR496C	YPR112C
YPR018W	YNL082W
YFL021W	YNL142W
YJL103C	YKL093W
YMR228W	YMR193W
YDR009W	YEL057C
YBR267W	YAL059W
YBR267W	YIL127C
YPL082C	YPL115C
YDR496C	YHR066W
YOR038C	YBL104C
YBR033W	YHL024W
YGL073W	YCL002C
YGL073W	YLR083C
YOR372C	YCL014W
YDR253C	YIL074C
YNL309W	YPL267W
YKL062W	YBR203W
YOL067C	YLR393W
YBR202W	YDL171C
YMR280C	YDR277C
YLR015W	YBR257W
YBR049C	YKL112W
YBR267W	YPL093W
YKR064W	YJR090C
YKR034W	YKR039W
YMR280C	YAL062W
YMR280C	YKL093W
YMR179W	YLR103C
YCR018C	YLR040C
YPR104C	YIL126W
YLR131C	YJL092W
YDR311W	YOR304W
YIL101C	YPL230W
YIL101C	YOL052C-A
YDR146C	YGL028C
YGL192W	YCL027W
YML113W	YBR267W
YLR182W	YPR141C
YGR067C	YPR001W
YGR067C	YMR206W
YMR228W	YBL090W
YBR033W	YMR206W
YBR033W	YHR094C
YNL132W	YDR060W
YPL082C	YKR090W
YBR154C	YGR187C
YIR023W	YJL076W
YDR034C	YJR086W
YJL168C	YDL074C
YLR131C	YMR030W-A
YDR213W	YAL068C
YNL132W	YJL050W
YCR018C	YCL073C
YBR112C	YGR056W
YER109C	YLR233C
YBR033W	YGL205W
YCR081W	YGL206C
YPL038W	YJL006C
YNL132W	YNL175C
YOR077W	YJR055W
YIR017C	YHR176W
YNR054C	YBR155W
YMR280C	YKL171W
YDR146C	YHR061C
YGR044C	YOL104C
YLR136C	YLL051C
YDR496C	YIL127C
YDR009W	YMR280C
YCL066W	YBR157C
YPR196W	YJR154W
YGR067C	YCR010C
YFR034C	YER114C
YBR154C	YJL148W
YLR131C	YAR018C
YLR256W	YHR168W
YER028C	YGL209W
YNL132W	YNL248C
YPR104C	YEL032W
YDR448W	YGL178W
YMR179W	YHR153C
YBR154C	YNL248C
YOR358W	YMR244C-A
YDR496C	YHR170W
YDR213W	YOR009W
YML027W	YBL002W
YPL230W	YFR017C
YBR112C	YDR464W
YJL168C	YIL126W
YJL103C	YLL041C
YMR280C	YOR178C
YGR067C	YGR243W
YCR106W	YBR299W
YDR496C	YKL099C
YMR075W	YJR011C
YML113W	YBL054W
YCL066W	YAR010C
YOL067C	YDR314C
YCL055W	YLR452C
YBR240C	YAL067C
YMR075W	YLR114C
YIR017C	YHR112C
YER040W	YER068W
YBL005W	YHL020C
YGR067C	YPL201C
YDL170W	YJL071W
YDR496C	YDL148C
YIR018W	YLR135W
YDR009W	YDR345C
YPL016W	YOR140W
YBR267W	YNL182C
YOR140W	YLR139C
YLR256W	YOR066W
YNL132W	YLL034C
YDR496C	YOR004W
YLR223C	YBR172C
YBR267W	YNL299W
YGR067C	YHL032C
YPR008W	YOL078W
YML027W	YPL267W
YOR229W	YJL194W
YDL170W	YEL072W
YLR014C	YMR127C
YDR496C	YGR272C
YPR018W	YPL267W
YOR315W	YMR030W-A
YKR034W	YBR240C
YMR280C	YBR050C
YBR240C	YNR058W
YDL166C	YDL213C
YPL230W	YGR070W
YDR496C	YKL078W
YJR140C	YPR189W
YER164W	YLR357W
YIL130W	YLR071C
YBR240C	YNL116W
YCR018C	YBL029W
YGR044C	YOR212W
YBR154C	YMR131C
YOR358W	YHR011W
YPR104C	YER001W
YGL209W	YHR094C
YDR296W	YIL098C
YLL054C	YCL017C
YFL052W	YGL146C
YBR033W	YEL070W
YDR034C	YJL099W
YOL067C	YLL038C
YOR140W	YBR202W
YMR280C	YEL070W
YMR070W	YML075C
YBR267W	YIL091C
YOL067C	YHL018W
YOR315W	YPL253C
YDR146C	YLR353W
YCR018C	YDL227C
YCL066W	YDR316W-B
YPL016W	YLR373C
YDR451C	YOR315W
YLR453C	YHL018W
YOR038C	YHR036W
YOR038C	YOR373W
YDR146C	YHR023W
YJR127C	YGR143W
YPL016W	YPR104C
YBR267W	YOR294W
YDR034C	YEL058W
YMR280C	YGR067C
YKL185W	YLR190W
YCR065W	YDL240W
YCL066W	YGR295C
YOR210W	YNL244C
YBR239C	YJR086W
YPL230W	YLR149C
YLR136C	YOL158C
YDR496C	YCL054W
YDR496C	YDL063C
YDR496C	YNL182C
YNL139C	YDR159W
YER111C	YOL069W
YIL119C	YLR256W
YDL048C	YOR107W
YPL128C	YDL240W
YNL309W	YEL064C
YMR280C	YHL032C
YIL130W	YKL161C
YBR240C	YNL117W
YCR018C	YIL048W
YBR112C	YLR139C
YBR112C	YOR373W
YDR296W	YBR251W
YDR496C	YLL008W
YPL128C	YPR104C
YPL082C	YJL197W
YGR252W	YPR171W
YPR104C	YKR090W
YGL209W	YDR345C
YDR496C	YAL059W
YDR496C	YKL172W
YLR223C	YJL197W
YLR375W	YGR138C
YBR033W	YGR067C
YOR140W	YDR371W
YOR315W	YDL003W
YBR202W	YJL194W
YKR034W	YHL016C
YGR067C	YMR107W
YDR146C	YPL127C
YPL082C	YDL240W
YBL093C	YOR338W
YDR496C	YDL208W
YDR034C	YCR018C
YOL067C	YNR069C
YOR315W	YNR009W
YKL072W	YLR015W
YIL130W	YDL209C
YNL132W	YPL217C
YML027W	YER032W
YPR104C	YDL072C
YBL093C	YNR004W
YBL093C	YLR323C
YJL168C	YBR028C
YOR229W	YGR143W
YFL021W	YKR039W
YOR337W	YJR111C
YIL101C	YDL199C
YBR083W	YGR044C
YCR097W	YNL145W
YDL170W	YGL184C
YGR044C	YIL173W
YDR451C	YOR284W
YKL062W	YOR178C
YDL048C	YDR247W
YOR210W	YHR072W-A
YNL309W	YNL289W
YBR240C	YDL210W
YPL230W	YLR327C
YBR154C	YLR175W
YDR296W	YDR322W
YLR131C	YJL051W
YBR267W	YDL031W
YLR182W	YJL074C
YIR033W	YDR275W
YCR018C	YOL158C
YGR252W	YEL061C
YBL093C	YLR007W
YLR223C	YPR104C
YOR140W	YLR087C
YNL257C	YOR338W
YBR239C	YOL164W
YNL132W	YNL061W
YCR018C	YAR009C
YJL168C	YDL072C
YLR375W	YDR438W
YBR033W	YMR280C
YBR033W	YIL162W
YER111C	YKR077W
YPL128C	YNL197C
YOR315W	YAR018C
YJL103C	YML042W
YLR182W	YKR010C
YPL202C	YLL060C
YFR034C	YPR104C
YFR034C	YEL032W
YDL170W	YER081W
YIL056W	YDL231C
YOR038C	YBR028C
YIL101C	YJL045W
YNL132W	YJR070C
YCR018C	YLR053C
YGR044C	YCL027W
YDR451C	YMR144W
YPR018W	YKL108W
YOR038C	YOR129C
YBR033W	YFL030W
YGR067C	YHR094C
YBR240C	YGL255W
YNL132W	YMR128W
YOR304W	YNL225C
YDR496C	YLR222C
YCL066W	YLR466C-B
YOR290C	YIR006C
YDR034C	YLR040C
YJL056C	YGL255W
YDR496C	YHR148W
YPR018W	YKL089W
YNR054C	YOR272W
YDR034C	YOR064C
YJR017C	YDR388W
YBL005W	YCR107W
YFL031W	YLR245C
YIL101C	YDL204W
YJL110C	YDR191W
YPR008W	YLR256W
YBR240C	YJL214W
YPL082C	YBR112C
YML027W	YLR103C
YDR496C	YDR398W
YER045C	YGL051W
YIR017C	YLL062C
YKL062W	YER098W
YDR034C	YGR044C
YOR315W	YDL227C
YER040W	YER129W
YCR065W	YCL063W
YNL132W	YJL109C
YML027W	YLR353W
YOR113W	YBR225W
YDR277C	YIR016W
YBR154C	YOR310C
YDR496C	YNR053C
YJL127C	YDL037C
YGL151W	YDR407C
YJR140C	YJR031C
YNL132W	YLR222C
YDL170W	YPR075C
YOR038C	YOR134W
YDR034C	YGR295C
YPL049C	YBR197C
YJR017C	YMR276W
YOR140W	YCR077C
YGR067C	YPR002W
YNL132W	YDR165W
YDR009W	YBR050C
YLR131C	YBR018C
YDR451C	YDR146C
YOR290C	YPL269W
YDR034C	YLR265C
YER111C	YLR090W
YPL128C	YDR389W
YDR253C	YJR137C
YER164W	YPL082C
YER164W	YDR464W
YDR146C	YJL051W
YNL132W	YER006W
YCR018C	YLR452C
YML113W	YOR145C
YPL016W	YDR409W
YBR267W	YOR078W
YBR033W	YHL047C
YOR140W	YEL032W
YER130C	YJR055W
YGR067C	YPR030W
YIL130W	YDL072C
YMR179W	YKL113C
YNL132W	YPL211W
YIL056W	YOR049C
YOL004W	YBL007C
YJL176C	YAL024C
YCL066W	YGR044C
YCL066W	YDR261C-D
YPL016W	YHR099W
YNR054C	YOR091W
YDR448W	YMR069W
YOR083W	YEL061C
YMR280C	YMR056C
YBR240C	YER138W-A
YNL132W	YHR197W
YML027W	YHR149C
YMR228W	YPL097W
YDR496C	YLR129W
YBR267W	YJL069C
YLR098C	YGR071C
YDR310C	YEL032W
YPL128C	YDR331W
YKR034W	YIR031C
YFR034C	YLR141W
YNL132W	YDL014W
YMR053C	YDL149W
YPL082C	YOR233W
YBR154C	YHR089C
YML010W	YNR008W
YDR451C	YOL007C
YBR267W	YBR034C
YOR038C	YDR147W
YJL089W	YER065C
YOR140W	YDR409W
YOR337W	YNL311C
YIR033W	YOL078W
YML081W	YLR403W
YDR009W	YLR342W
YLL054C	YDR331W
YLR375W	YIL047C
YFL052W	YBR203W
YDR451C	YLR084C
YGR067C	YEL070W
YLR256W	YDR475C
YNL132W	YGR200C
YOR032C	YBL029W
YML027W	YNL072W
YML027W	YKR090W
YBR112C	YHR099W
YDR496C	YHR085W
YDR496C	YLR002C
YDR034C	YBL016W
YOL067C	YMR159C
YOR315W	YNL300W
YMR280C	YPR060C
YGR067C	YLR307C-A
YBR239C	YDR261C-D
YHR124W	YOL162W
YPL202C	YKL070W
YMR179W	YOL017W
YML027W	YDR113C
YMR228W	YNL315C
YKR099W	YIL092W
YKR034W	YAR035W
YML091C	YKR016W
YML091C	YKL148C
YMR179W	YKL042W
YDL166C	YNL110C
YML113W	YNL186W
YCL066W	YCL064C
YIR017C	YBR069C
YNR054C	YGL099W
YBR033W	YHL032C
YKL112W	YDR301W
YKL109W	YBL043W
YMR280C	YNL117W
YBR240C	YAL062W
YBR240C	YBL101W-B
YBR240C	YAR028W
YPL016W	YJR066W
YFL052W	YER024W
YPR018W	YCL024W
YER184C	YMR094W
YNL132W	YLR409C
YOR304W	YDR464W
YOL004W	YMR109W
YML027W	YDL101C
YKR099W	YNL299W
YKR099W	YBR234C
YBR112C	YNR074C
YER109C	YJR154W
YFL052W	YLR152C
YFL052W	YAR028W
YOR315W	YNL066W
YFL031W	YLR315W
YMR273C	YMR219W
YCR018C	YBR073W
YOR032C	YGR295C
YPL082C	YLR357W
YMR168C	YMR167W
YLR278C	YLL013C
YFL052W	YOR384W
YIL101C	YIL099W
YNR063W	YDL037C
YMR019W	YBL104C
YPL230W	YNL195C
YNL139C	YPL085W
YDR034C	YOL104C
YMR280C	YBR285W
YCR018C	YDR261C
YCR018C	YOR394C-A
YML027W	YKR013W
YGR044C	YEL021W
YDR496C	YGR145W
YMR136W	YPR030W
YFL052W	YBR240C
YBR267W	YOR056C
YOR083W	YJL076W
YKR034W	YLR307C-A
YNL309W	YLR313C
YIL101C	YAL061W
YGR067C	YIL155C
YER164W	YPL085W
YER064C	YPL111W
YDL170W	YJR130C
YMR228W	YBR282W
YML007W	YER143W
YDR277C	YGL146C
YDR496C	YOR145C
YLR278C	YLR135W
YCL066W	YLR265C
YDR451C	YLR312C-B
YNR054C	YER082C
YNR054C	YNL175C
YDR253C	YBR294W
YKL109W	YML120C
YMR280C	YNL144C
YGR067C	YFL030W
YGR067C	YJL045W
YHR124W	YMR101C
YHR124W	YNR064C
YMR179W	YFL008W
YNL132W	YDL112W
YDL170W	YJR127C
YIL084C	YPR168W
YPL082C	YNL298W
YDR277C	YLR327C
YPR104C	YOR233W
YDR496C	YLR068W
YDR496C	YCR016W
YDR009W	YEL069C
YDR451C	YKR013W
YBR267W	YDL060W
YBR033W	YPR030W
YBR202W	YMR180C
YDR253C	YHR176W
YBR239C	YJL145W
YCR065W	YER070W
YNL132W	YGR103W
YCR018C	YIL117C
YOL004W	YHR165C
YDR496C	YBR247C
YDR496C	YDR412W
YPR196W	YNR056C
YBR267W	YBR141C
YDR223W	YOR031W
YJL127C	YNR063W
YOR298C-A	YNL007C
YDR207C	YDR464W
YML081W	YIL047C
YNL132W	YKL014C
YNL132W	YKR081C
YPL082C	YBL034C
YML027W	YJL118W
YOR113W	YJL083W
YKR099W	YKR056W
YDR496C	YBL028C
YDR496C	YLR009W
YDR034C	YIL117C
YER111C	YEL061C
YPL042C	YPL082C
YMR280C	YML054C
YAL021C	YCR084C
YBR240C	YJL146W
YKR099W	YNL186W
YDR296W	YHR038W
YKL043W	YFL021W
YLR131C	YLR045C
YDR034C	YDL231C
YPL049C	YLL018C
YOR083W	YJL092W
YDL056W	YPR055W
YIL101C	YDL223C
YIL130W	YJL099W
YBR240C	YIR019C
YGL192W	YLR053C
YOL004W	YOR330C
YML027W	YIL140W
YDR277C	YNR045W
YCR096C	YLR254C
YPL016W	YIL117C
YLR131C	YBR020W
YPR018W	YMR048W
YDR448W	YLL038C
YOR083W	YBR112C
YOL067C	YAL048C
YOR372C	YDL156W
YBR083W	YNL078W
YMR280C	YHR133C
YDR223W	YBL049W
YNL132W	YOR340C
YIL084C	YLL038C
YDL166C	YER002W
YCR018C	YBR013C
YBR154C	YKL009W
YBR154C	YOR340C
YPR031W	YAL011W
YNR054C	YDL201W
YOR083W	YOR025W
YIL101C	YKL107W
YCR018C	YBL095W
YML027W	YOR073W
YML027W	YKL042W
YNL139C	YDR208W
YBR202W	YBL104C
YER130C	YJR052W
YIL101C	YPL186C
YDR146C	YKL164C
YMR179W	YDL101C
YER064C	YDR508C
YDR397C	YNL008C
YPL230W	YEL011W
YDR496C	YMR128W
YDR496C	YBL039C
YML010W	YJL076W
YLR131C	YPL158C
YFL052W	YAR035W
YNR054C	YDL150W
YAL021C	YOR298W
YGL192W	YOL158C
YGR044C	YLR031W
YDR277C	YMR206W
YBR154C	YDL208W
YLR136C	YEL065W
YDR296W	YBL059W
YPL048W	YER152C
YOR290C	YNL024C
YMR280C	YGL157W
YPR008W	YDL194W
YNL132W	YOR243C
YNL132W	YDL148C
YBR154C	YGR128C
YBL093C	YBR257W
YGL209W	YKR016W
YCL066W	YGL051W
YLR131C	YOL069W
YFL052W	YJL214W
YNR054C	YOR056C
YBR033W	YAL062W
YKR064W	YIL144W
YLR182W	YJR066W
YBL054W	YBL071W-A
YNL132W	YPL012W
YLR014C	YDR179W-A
YGR252W	YEL018W
YDR009W	YPR083W
YLR013W	YBL008W-A
YFL052W	YFL060C
YDR451C	YDR113C
YKL062W	YNL144C
YLR399C	YCR033W
YBR033W	YDR342C
YIL131C	YBL009W
YOR315W	YDL240W
YFL021W	YIR032C
YKR034W	YBR299W
YFL031W	YLL018C
YMR280C	YML125C
YMR280C	YHR068W
YBR239C	YBL095W
YMR042W	YEL032W
YIL130W	YJL197W
YIL130W	YKR086W
YLR256W	YJR127C
YNL132W	YLL008W
YNL132W	YGR128C
YKR099W	YOR233W
YDR496C	YNL308C
YNL139C	YBR112C
YPL016W	YER114C
YMR136W	YML125C
YBR267W	YLR068W
YLR399C	YLL029W
YOR315W	YLR353W
YIL101C	YHR097C
YBR239C	YGR295C
YBL054W	YNL002C
YOR230W	YOR386W
YKL185W	YJL051W
YNR063W	YMR094W
YGR044C	YDR034C-A
YDR296W	YNL284C
YNL139C	YHR099W
YDR009W	YLR004C
YLR278C	YLR256W
YJL168C	YDL155W
YBR267W	YDR299W
YOR038C	YKR090W
YNR054C	YKR081C
YJR017C	YDR366C
YOR315W	YGR221C
YOR315W	YJL078C
YBL005W	YBR069C
YLR182W	YJL181W
YIL101C	YDR070C
YMR280C	YGR243W
YIL130W	YPL082C
YCR065W	YGR014W
YNL132W	YML093W
YNL132W	YGL171W
YDL170W	YCL030C
YML027W	YDR528W
YGR044C	YNL279W
YPL230W	YER054C
YGR252W	YJR031C
YJL176C	YGR252W
YDR310C	YER164W
YER111C	YJL194W
YOR315W	YBR028C
YMR280C	YPL200W
YPR008W	YMR321C
YGR089W	YER008C
YNL132W	YJR041C
YML027W	YHR172W
YDR009W	YDR536W
YJL168C	YBL102W
YBR267W	YOR287C
YNR054C	YLR449W
YDR253C	YLL061W
YGR040W	YOR284W
YMR280C	YML042W
YGR067C	YLR377C
YBL054W	YIL096C
YGL192W	YOR049C
YMR179W	YBL010C
YPL082C	YER001W
YML027W	YAL024C
YDR296W	YCR071C
YDR496C	YOL077C
YDR009W	YKL217W
YJL127C	YLR047C
YLR131C	YBR112C
YBR033W	YNL108C
YDR034C	YDR316W-B
YGL151W	YMR218C
YOR140W	YPL042C
YIL101C	YOL083W
YNL132W	YOR310C
YOR304W	YPL082C
YDR496C	YNL061W
YDR451C	YJR030C
YPL089C	YOR208W
YLR182W	YPL269W
YMR280C	YNR071C
YGR097W	YOR208W
YPL202C	YHR134W
YFR034C	YAL013W
YGL192W	YOR032C
YNL132W	YNL112W
YOR358W	YGR021W
YDR009W	YFL052W
YNR054C	YHR148W
YKR034W	YNL117W
YML091C	YKL134C
YMR280C	YJL192C
YLR256W	YLR263W
YDR146C	YGR221C
YCL055W	YHR005C
YGL192W	YDL227C
YOR077W	YPR017C
YMR228W	YBR268W
YNR054C	YDR365C
YBR033W	YIL160C
YGL013C	YML007W
YFL031W	YER125W
YMR280C	YKL148C
YBL054W	YOR004W
YBL054W	YNL162W-A
YNL132W	YLR197W
YJR127C	YHL028W
YPL082C	YGR056W
YPL016W	YDR391C
YOR290C	YGL142C
YBR033W	YDL079C
YBR033W	YBR203W
YDL056W	YOR330C
YDL048C	YGR138C
YBR202W	YOR066W
YIL101C	YIL136W
YGR067C	YDL079C
YPR015C	YGR131W
YNL132W	YDR101C
YNL132W	YNL062C
YPL082C	YJL087C
YDR277C	YOR178C
YMR213W	YOL078W
YPR104C	YOR204W
YDR296W	YPR047W
YDR496C	YLR363W-A
YDR496C	YBR142W
YDR009W	YBR018C
YBR049C	YGL083W
YDR451C	YEL061C
YBR267W	YDR083W
YDR034C	YFL010C
YIL101C	YOR173W
YBR010W	YMR003W
YER164W	YDL140C
YGL192W	YLR042C
YER028C	YER060W
YCR097W	YNL146C-A
YCR106W	YJL165C
YGL209W	YPR083W
YDR296W	YDR041W
YDR496C	YGR283C
YDR496C	YJL050W
YDR009W	YFL059W
YDR451C	YDR507C
YNR054C	YDR161W
YNR054C	YHR066W
YFL021W	YGR121C
YJL103C	YDR178W
YFL031W	YOR204W
YGR067C	YAL062W
YGR067C	YHL024W
YMR042W	YNR048W
YMR070W	YOR205C
YNL132W	YOL041C
YCR018C	YGL251C
YKR099W	YDR100W
YBR154C	YLR196W
YDR296W	YNL177C
YDR009W	YBR020W
YCL066W	YDL180W
YFL052W	YIR019C
YPR018W	YKL042W
YER111C	YDL066W
YPL128C	YNL323W
YJL103C	YHR001W-A
YBL005W	YPL111W
YPL254W	YHR007C-A
YER130C	YOR381W
YMR179W	YKL089W
YDR296W	YLR239C
YDR496C	YKL082C
YMR075W	YPR179C
YPL016W	YBR202W
YBR267W	YOR252W
YJL103C	YKL148C
YBR202W	YNL278W
YIR033W	YGL055W
YLR256W	YHL028W
YBR240C	YGL146C
YGL192W	YLL066W-B
YGL192W	YJL145W
YPL082C	YAL011W
YGR252W	YDL240W
YBR154C	YPL211W
YPR104C	YAL024C
YDR296W	YLR069C
YER109C	YEL061C
YNR054C	YNL110C
YBR033W	YPL200W
YGL073W	YOR023C
YOR064C	YDR261C
YKL109W	YNL144C
YJR127C	YDR475C
YOR032C	YOR049C
YFL044C	YGL047W
YNL139C	YDR464W
YDR009W	YGR286C
YJR060W	YBL005W-A
YOR038C	YKL161C
YNR054C	YNL182C
YPL049C	YER120W
YKL109W	YPL057C
YBR239C	YDL231C
YBR239C	YLR466C-B
YHR124W	YGR153W
YPL038W	YDR240C
YDR146C	YER032W
YKL185W	YPR119W
YBR240C	YDR090C
YBR112C	YAL011W
YBR154C	YMR290C
YDR296W	YGR076C
YDR496C	YKR024C
YML113W	YDL209C
YML113W	YFL023W
YIR017C	YMR120C
YPR018W	YAR008W
YBR267W	YJL033W
YOR290C	YLR187W
YOR315W	YLR084C
YDR146C	YDL003W
YBR240C	YKL220C
YOR032C	YLR053C
YOR032C	YML083C
YML027W	YDL240W
YBR112C	YLL049W
YDR296W	YLR312W-A
YER109C	YPL155C
YDR496C	YGR187C
YLR131C	YEL061C
YDR451C	YMR001C
YPR196W	YHR177W
YNL068C	YGR284C
YBR033W	YIL057C
YDL056W	YLR067C
YOL067C	YLR245C
YER184C	YML059C
YMR280C	YLR327C
YBL054W	YOR252W
YBL054W	YDR361C
YBL054W	YHR040W
YER164W	YHR165C
YNL132W	YLR175W
YCR018C	YDR012W
YGR044C	YOR394C-A
YOR358W	YJL042W
YDR496C	YOR287C
YDR009W	YGR201C
YDR009W	YNR071C
YFL052W	YAL062W
YDR451C	YPL256C
YLR399C	YLR256W
YOR140W	YIL047C
YLR228C	YBR145W
YJL110C	YBR153W
YGL192W	YCL021W-A
YCR065W	YNL289W
YPL230W	YJL141C
YDR296W	YIL093C
YDR296W	YOL053W
YBR049C	YBL011W
YDR451C	YFR027W
YOR038C	YLR139C
YBR202W	YOR058C
YMR280C	YML087C
YNL216W	YGL087C
YNR063W	YDL129W
YBR240C	YHL042W
YNL132W	YJL033W
YNL132W	YLR129W
YPL082C	YDR356W
YMR228W	YDR237W
YBR112C	YMR180C
YPR104C	YJL087C
YPR031W	YKR010C
YKL062W	YDR277C
YNR054C	YLR074C
YDR448W	YIL084C
YOR140W	YHR099W
YDR216W	YIL125W
YER040W	YJR015W
YML091C	YPR191W
YLR256W	YHR058C
YBR240C	YEL069C
YCR065W	YOR373W
YDL170W	YER039C-A
YMR273C	YBR059C
YBL021C	YER128W
YML027W	YCL061C
YGR044C	YJL051W
YPL230W	YIR014W
YBR154C	YLR197W
YBR154C	YOL041C
YDR496C	YIL103W
YJL176C	YDL240W
YDR009W	YGL146C
YML113W	YKR024C
YPL016W	YLR357W
YOR315W	YHR143W
YBR202W	YGR056W
YGR067C	YER024W
YBR240C	YGR065C
YDL170W	YER039C
YMR168C	YDR014W
YOR038C	YOL048C
YLR055C	YDL140C
YGR067C	YOR100C
YOR230W	YPR036W
YDR223W	YOR049C
YML081W	YCR008W
YMR179W	YOR074C
YNL132W	YDR324C
YFL044C	YDR032C
YDR296W	YJR080C
YPR013C	YDL231C
YDR207C	YIL126W
YGR067C	YER065C
YMR070W	YGR049W
YNL132W	YLR401C
YBR154C	YBL039C
YIR018W	YIR017C
YLR131C	YLR081W
YFL052W	YDL049C
YLR453C	YJR154W
YBR033W	YNR002C
YGR067C	YPR006C
YGR067C	YDL085W
YJR122W	YER058W
YMR053C	YHR128W
YOL004W	YDR301W
YPL082C	YAL024C
YMR228W	YBR122C
YDR496C	YDR101C
YDR496C	YAL025C
YNL139C	YAL011W
YIR017C	YGL125W
YBR267W	YCL036W
YJL089W	YMR017W
YBR033W	YOR047C
YGL151W	YLR166C
YOR315W	YFL017C
YOR372C	YLR373C
YOR372C	YHR061C
YDR253C	YBR213W
YPR008W	YNL144C
YPR008W	YPL026C
YDR223W	YMR322C
YDL170W	YHR018C
YBR112C	YCR093W
YDR277C	YPL201C
YBR154C	YGR081C
YBR154C	YDL167C
YOR358W	YIL162W
YGL209W	YAR035W
YER109C	YJR152W
YDR009W	YLR377C
YLL054C	YDR524W-A
YFL052W	YAL064C-A
YLR453C	YMR117C
YOR038C	YML027W
YOR290C	YDR150W
YNR054C	YDR087C
YBR033W	YPR083W
YBL005W	YLL010C
YDR253C	YLL055W
YLR182W	YPL082C
YNL309W	YPL209C
YBR083W	YCL027W
YMR280C	YIR016W
YBL054W	YKR056W
YPL202C	YOR338W
YHR178W	YDR012W
YFR034C	YDL156W
YBR240C	YBL029W
YMR179W	YDL003W
YDL166C	YKL099C
YOR032C	YOR178C
YKR099W	YDR464W
YBR112C	YDR356W
YBL093C	YOL045W
YPL016W	YLR087C
YDR451C	YGL021W
YBR267W	YDR021W
YBR033W	YML125C
YDR034C	YOR212W
YOR083W	YLR141W
YGL151W	YPR055W
YOR028C	YML018C
YJL103C	YJL153C
YBR202W	YLR139C
YKR034W	YBR069C
YIL101C	YBR214W
YAL021C	YOR301W
YER064C	YBL005W-A
YFL044C	YOL065C
YBR112C	YDL171C
YBR112C	YDR391C
YPR104C	YPR141C
YDR496C	YOL041C
YLR223C	YJL098W
YML113W	YOR359W
YML010W	YGR116W
YLR131C	YMR198W
YDR451C	YMR001C-A
YDR451C	YAL034W-A
YJL089W	YLR174W
YGR249W	YGR052W
YPL128C	YEL032W
YBR202W	YMR042W
YMR280C	YNR045W
YBL054W	YNL124W
YBR240C	YNR057C
YMR053C	YNL223W
YGR252W	YJR053W
YDR496C	YLR003C
YDR009W	YBR240C
YJL168C	YJL090C
YLR375W	YDR459C
YKL062W	YER158C
YDL056W	YMR287C
YDL048C	YKR075C
YOR315W	YPL127C
YBL005W	YDL160C
YBL005W	YKL127W
YOR372C	YEL061C
YFL031W	YKR042W
YIL101C	YDL169C
YMR280C	YGL205W
YIL130W	YFR048W
YDR146C	YMR144W
YCR065W	YGR109C
YJR127C	YOR107W
YCR018C	YIR042C
YPR031W	YKR086W
YPL016W	YNL278W
YBR033W	YEL069C
YOR140W	YJL083W
YOR064C	YBL095W
YJL103C	YPR030W
YBR202W	YKR061W
YBL005W	YOR060C
YBR239C	YGL192W
YBR240C	YJR152W
YPR015C	YBR076W
YCR065W	YLR141W
YML027W	YOR247W
YMR213W	YGL064C
YDR296W	YIL157C
YER109C	YER040W
YER109C	YER129W
YNL139C	YIL126W
YLR223C	YOR144C
YCR066W	YOR279C
YOR038C	YJL181W
YOR290C	YMR219W
YJR017C	YCL009C
YDL056W	YDR176W
YOR315W	YGL010W
YBL005W	YDR261C-D
YOR372C	YMR001C-A
YLR256W	YDR444W
YKL185W	YPL141C
YDR296W	YDR175C
YDR009W	YKL148C
YBR267W	YHR148W
YOR038C	YBR202W
YNR054C	YJL033W
YOR229W	YIL121W
YPL128C	YPL032C
YPL202C	YKR071C
YFR034C	YDR464W
YPR015C	YMR101C
YNL132W	YDL208W
YNL132W	YGR187C
YML076C	YJL146W
YDR296W	YER058W
YDR496C	YDR324C
YDR496C	YJL033W
YDR496C	YDR449C
YDR496C	YPL093W
YIR018W	YLR136C
YDR009W	YHL044W
YDR009W	YJL214W
YLR013W	YNL318C
YIR017C	YBR147W
YFL052W	YLR004C
YDR451C	YJR092W
YPR018W	YLR103C
YJL089W	YER078W-A
YDR034C	YAR010C
YDR310C	YDR207C
YDR310C	YEL007W
YOR083W	YOR181W
YJR017C	YPL098C
YIL119C	YPR008W
YMR039C	YLR081W
YLR442C	YDR356W
YLR182W	YKR083C
YLR182W	YCL061C
YOR337W	YKL029C
YML091C	YFR011C
YGR040W	YDL129W
YGR067C	YNL108C
YBR239C	YDR261C
YHR124W	YKR097W
YHR124W	YIL120W
YNL216W	YFR028C
YNR063W	YBL074C
YPL082C	YDR225W
YML027W	YKL101W
YDR277C	YML042W
YBR154C	YAL025C
YDR496C	YDR165W
YJL176C	YJL087C
YBR267W	YML043C
YBR267W	YOL080C
YIL131C	YKL163W
YHR124W	YMR232W
YPL202C	YGR016W
YMR070W	YMR015C
YPL230W	YIL077C
YBR112C	YBL011W
YPR104C	YDL155W
YER109C	YBR196C-B
YNL139C	YLR087C
YPR031W	YDR464W
YPR031W	YBR234C
YPL016W	YER164W
YBR267W	YCL054W
YBR267W	YKL078W
YNR054C	YOL144W
YNL031C	YDR224C
YBR202W	YBR265W
YBL005W	YDR046C
YPL042C	YPL221W
YHR041C	YML041C
YMR053C	YLR149C
YCR106W	YBL005W-A
YPL082C	YER114C
YDR496C	YLR409C
YLR131C	YLR353W
YBR267W	YDR449C
YBR267W	YOL144W
YGL073W	YML019W
YER111C	YAL024C
YDL048C	YPR157W
YOR064C	YPR061C
YNL309W	YOR284W
YJR140C	YDR217C
YFL031W	YLL010C
YBL054W	YDR021W
YDR146C	YNR009W
YNR063W	YML037C
YBR240C	YER158C
YML027W	YHR154W
YBR154C	YOL077C
YDR496C	YBR141C
YNL139C	YOL004W
YFL052W	YAR027W
YOR229W	YDR448W
YIL119C	YOR066W
YOR140W	YBL105C
YIL101C	YNL194C
YMR280C	YEL001C
YMR280C	YDR342C
YER164W	YBR112C
YDR223W	YPL223C
YER028C	YIL162W
YFL044C	YOR347C
YPL082C	YER132C
YBR154C	YDR165W
YPR104C	YKR010C
YNL139C	YDR150W
YJL176C	YOR093C
YDR451C	YLR353W
YDR451C	YBR078W
YBR033W	YHR128W
YBR033W	YGL146C
YOR372C	YKR090W
YGR040W	YOL163W
YMR280C	YJR095W
YGR067C	YMR081C
YBL054W	YJL033W
YDR223W	YOR186W
YBR240C	YNL142W
YKL015W	YLR114C
YDL170W	YBR145W
YML027W	YOR074C
YOR113W	YDR359C
YBL093C	YNL065W
YDR496C	YDL031W
YLR223C	YIL130W
YDR009W	YJR095W
YLR278C	YDR475C
YLR278C	YDR410C
YLR278C	YGR143W
YBR267W	YIL104C
YNR054C	YOR340C
YOR140W	YLR373C
YOR140W	YLR357W
YMR280C	YLR174W
YGR067C	YKR097W
YNL132W	YDL063C
YPL082C	YBL023C
YDL020C	YDL168W
YLR403W	YER114C
YDR296W	YJL180C
YDR296W	YBR146W
YDR496C	YLR196W
YCR096C	YNL136W
YLR278C	YJL079C
YCL066W	YDR103W
YIR017C	YIL074C
YOR315W	YHR172W
YJL103C	YNR002C
YBR202W	YDR391C
YKR034W	YOR153W
YBL005W	YOL104C
YBL005W	YAR009C
YBR239C	YCR018C
YDR146C	YLR045C
YDR146C	YGR109C
YGR044C	YGR295C
YBR112C	YOR017W
YDR496C	YHR197W
YNL139C	YPL269W
YJL176C	YPL066W
YPL016W	YAL011W
YJL168C	YPL082C
YBR267W	YBL054W
YBR267W	YHR196W
YNR054C	YGR145W
YDR034C	YDR261C
YCR081W	YKL215C
YER184C	YGL240W
YKR034W	YJR095W
YDR253C	YPL111W
YMR280C	YBR203W
YBR239C	YDR261W-B
YPR008W	YML087C
YLR015W	YDL098C
YDR146C	YPL155C
YJR127C	YLR135W
YLR014C	YJR097W
YGR044C	YBR158W
YGR044C	YBR073W
YDR009W	YBR299W
YCL066W	YDR261W-B
YJR060W	YIL082W-A
YBR033W	YDL245C
YDR310C	YIR010W
YOR083W	YBL013W
YDL056W	YNL118C
YOR140W	YDL140C
YOR315W	YCR065W
YBL005W	YNL277W
YGL013C	YOR023C
YKL072W	YBL093C
YER164W	YLR087C
YPR008W	YNR045W
YDR146C	YOL069W
YJR122W	YLR163C
YMR019W	YGR065C
YMR228W	YIL070C
YGR161C	YPL250C
YDR496C	YCR072C
YDR496C	YOR206W
YER169W	YOR107W
YDR009W	YBR019C
YBR049C	YPR104C
YJL127C	YDR065W
YFL052W	YFL030W
YNR054C	YDL148C
YDL056W	YIL095W
YBR202W	YPR120C
YJR140C	YER105C
YIL101C	YKL026C
YGR067C	YOR047C
YDR520C	YOL128C
YDR146C	YGR041W
YGL192W	YPR118W
YMR179W	YLR194C
YNL132W	YDR120C
YFL044C	YMR230W-A
YPL082C	YDL156W
YPL082C	YPL085W
YML027W	YPR120C
YBR112C	YAL024C
YDR496C	YOR001W
YDR496C	YDR021W
YDR496C	YGL171W
YLR223C	YFL023W
YLR278C	YER098W
YPR018W	YDR113C
YBR033W	YDR222W
YIL119C	YJL079C
YOL067C	YDL129W
YOR210W	YPL237W
YLR182W	YAL024C
YGL192W	YNL035C
YNL132W	YCR057C
YGR044C	YOL164W
YDR496C	YJL122W
YDR496C	YKR060W
YDR009W	YDL079C
YDR009W	YLR081W
YML010W	YLR335W
YMR136W	YIL042C
YBR267W	YKR081C
YOR038C	YDR113C
YJL089W	YJR095W
YBR033W	YMR081C
YER111C	YLR187W
YER111C	YIL026C
YJL103C	YDL181W
YKL112W	YDR208W
YFL031W	YLL018C-A
YMR280C	YER065C
YIL130W	YBL014C
YIL130W	YBR172C
YDR223W	YJL105W
YPR199C	YOR092W
YGL192W	YAR023C
YKL032C	YNL278W
YFL044C	YKR018C
YML027W	YGR041W
YML027W	YNL283C
YDR496C	YDR184C
YCL066W	YLR452C
YFL052W	YER138W-A
YNR054C	YMR131C
YNR054C	YMR049C
YGL073W	YBR238C
YDL056W	YHR142W
YDL048C	YER098W
YJL103C	YML120C
YKR034W	YMR088C
YKR034W	YPR083W
YML091C	YFR033C
YMR280C	YML120C
YGR067C	YBR299W
YGL192W	YEL058W
YNL132W	YGR145W
YNL132W	YGR245C
YMR053C	YBR128C
YCR106W	YBR013C
YML027W	YPL127C
YML027W	YIL026C
YBR150C	YLR425W
YMR168C	YMR063W
YML010W	YLL021W
YOR229W	YOR107W
YBR033W	YHR068W
YPL049C	YIL082W-A
YJR017C	YER089C
YOR315W	YDR501W
YJL103C	YAL054C
YBL005W	YKR069W
YIL101C	YML118W
YKL185W	YNL058C
YNL132W	YJL148W
YOR304W	YAL011W
YFL044C	YER143W
YML027W	YMR076C
YLR136C	YHL044W
YLL054C	YMR063W
YJL168C	YLR067C
YBR267W	YDR101C
YBR267W	YDR398W
YNR054C	YDL166C
YNR054C	YPR112C
YOL067C	YHR199C-A
YOR315W	YBL031W
YKL112W	YGL201C
YBL005W	YFL056C
YDR253C	YKL068W
YIL101C	YPL054W
YIL101C	YOL052C
YGL192W	YOL159C-A
YNL132W	YNL313C
YFL044C	YIR036C
YCR106W	YIL082W-A
YDR496C	YPL211W
YBR267W	YLR009W
YBR267W	YNL119W
YBR033W	YPL019C
YNL031C	YBL002W
YGL151W	YMR192W
YMR039C	YLR461W
YKL109W	YOR147W
YBR083W	YHR005C
YMR280C	YBL043W
YBL054W	YIL127C
YLR015W	YOL054W
YPR199C	YLR263W
YNL216W	YLR305C
YML081W	YER114C
YBR240C	YBR299W
YAL013W	YNL161W
YCR065W	YNL190W
YER064C	YBR069C
YOR304W	YIL126W
YCR018C	YEL021W
YCR018C	YGR109W-A
YOL004W	YOR181W
YGR044C	YDR316W-B
YPL230W	YNR034W
YBR154C	YPR110C
YDR296W	YNR037C
YCR096C	YLR298C
YJL176C	YJR053W
YIR017C	YDL170W
[truncated: 63,536 more rows]

## Sheet: CLR-PROM_growthRatio
TF	Predicted growth rate for TF knockout	Predicted growth ratio			TF	Predicted growth rate for TF knockout	Predicted growth ratio	Experiment growth ratio			Spearman correlation coefficient	P-value
YAL013W	1.63211	1			YAL051W	1.59352	0.976364	1			0.0433	0.6438
YAL021C	1.63211	1			YBL021C	0.929208	0.569333	0.727273
YAL051W	1.59352	0.976364			YBL054W	1.63211	1	0.969697			Euclidean distance	3.9748
YBL005W	0.969032	0.593733			YBL103C	1.63211	1	0.151515			relative error	0.3999
YBL008W	1.63211	1			YBR033W	1.63211	1	1			10000 permtest P-value	0.6223
YBL021C	0.929208	0.569333			YBR150C	1.63211	1	1
YBL054W	1.63211	1			YBR182C	1.45001	0.888434	0.969697			Matthews correlation coefficient (Threshold 0.95)	0.1441
YBL093C	1.63211	1			YBR239C	1.63211	1	1
YBL103C	1.63211	1			YBR240C	0.407226	0.24951	1
YBR010W	1.63211	1			YBR297W	0.706321	0.432768	0.969697
YBR033W	1.63211	1			YCR106W	1.63211	1	1
YBR049C	1.63211	1			YDL020C	1.63211	1	0.909091
YBR066C	1.63202	0.99995			YDL048C	1.63211	1	0.969697
YBR083W	1.59101	0.974821			YDL106C	1.6321	1	0.545455
YBR089C-A	1.63211	1			YDL170W	0.58744	0.359929	0.939394
YBR098W	1.63211	1			YDR009W	1.63211	1	0.939394
YBR111W-A	1.63211	1			YDR026C	1.63211	1	1
YBR112C	1.63211	1			YDR043C	0.300982	0.184414	1
YBR150C	1.63211	1			YDR049W	1.63211	1	0.939394
YBR154C	1.63211	1			YDR096W	0.370991	0.227309	1
YBR182C	1.45001	0.888434			YDR123C	1.62749	0.997174	0.0909091
YBR193C	1.63211	1			YDR213W	1.63205	0.99997	1
YBR195C	1.63211	1			YDR216W	0.690291	0.422947	0.969697
YBR202W	1.63211	1			YDR253C	0.602895	0.369398	0.969697
YBR239C	1.63211	1			YDR266C	1.63211	1	0.333333
YBR240C	0.407226	0.24951			YDR277C	1.63211	1	0.969697
YBR267W	1.63211	1			YDR463W	1.63211	1	1
YBR289W	1.63211	1			YDR520C	1.63211	1	0.969697
YBR297W	0.706321	0.432768			YEL009C	1.63211	1	0.272727
YCL055W	1.63211	1			YER028C	0.885341	0.542455	0.909091
YCL066W	1.63211	1			YER040W	0.833132	0.510466	0.818182
YCR018C	0.903683	0.553694			YER045C	0.969325	0.593913	0.939394
YCR028C-A	1.63211	1			YER051W	1.63211	1	1
YCR065W	1.60977	0.986318			YER130C	1.09378	0.670167	1
YCR066W	1.63211	1			YER169W	0.184179	0.112848	1
YCR081W	1.63211	1			YER184C	1.63211	1	1
YCR096C	1.63211	1			YFL021W	0.233788	0.143244	1.0303
YCR097W	1.63211	1			YFL044C	1.63211	1	1
YCR106W	1.63211	1			YFL052W	1.63211	1	0.969697
YDL020C	1.63211	1			YGL013C	1.63211	1	1
YDL042C	1.63211	1			YGL035C	1.63211	1	1
YDL048C	1.63211	1			YGL162W	1.63197	0.999922	0.969697
YDL056W	1.63211	1			YGL181W	1.63211	1	0.969697
YDL106C	1.6321	1			YGL197W	1.63211	1	1.0303
YDL108W	1.63211	1			YGL209W	0.805366	0.493454	1
YDL166C	1.63211	1			YGL237C	0.328539	0.201298	0.666667
YDL170W	0.58744	0.359929			YGL254W	1.60619	0.984123	1
YDR005C	1.63211	1			YGR040W	1.63211	1	0.969697
YDR009W	1.63211	1			YGR067C	1.63211	1	1
YDR026C	1.63211	1			YGR097W	1.63211	1	0.939394
YDR034C	1.60308	0.982219			YGR249W	1.63205	0.99997	1
YDR043C	0.300982	0.184414			YHL009C	1.63211	1	1
YDR049W	1.63211	1			YHL020C	0.362692	0.222224	0.939394
YDR073W	1.63211	1			YHR006W	0.808181	0.495178	1
YDR081C	1.55305	0.951564			YHR178W	1.63211	1	0.151515
YDR096W	0.370991	0.227309			YIL036W	1.61776	0.991212	0.545455
YDR123C	1.62749	0.997174			YIL101C	0.176755	0.108299	1.0303
YDR146C	1.61952	0.992291			YIL119C	1.63211	1	1
YDR151C	1.63211	1			YIR017C	0.316175	0.193723	0.272727
YDR167W	1.63211	1			YIR018W	0.810658	0.496696	0.969697
YDR169C	1.63211	1			YIR023W	1.63211	1	1.0303
YDR174W	1.63211	1			YJL089W	1.27094	0.778712	0.939394
YDR207C	1.34555	0.824427			YJL110C	0.95236	0.583518	0.969697
YDR213W	1.63205	0.99997			YJL206C	1.57972	0.967906	1
YDR216W	0.690291	0.422947			YJR127C	1.25533	0.769151	0.909091
YDR223W	1.63211	1			YJR147W	1.59678	0.978358	1.0303
YDR253C	0.602895	0.369398			YKL015W	1.62736	0.997098	1
YDR259C	1.63211	1			YKL032C	1.63211	1	0.818182
YDR266C	1.63211	1			YKL038W	1.40785	0.8626	0.939394
YDR277C	1.63211	1			YKL062W	0.229248	0.140462	1.0303
YDR296W	1.63211	1			YKL109W	0.14401	0.0882359	0.575758
YDR303C	1.63211	1			YKL222C	1.63211	1	1
YDR310C	1.63211	1			YKR034W	0.873929	0.535463	0.909091
YDR311W	1.63211	1			YKR064W	1.63211	1	0.969697
YDR392W	1.63211	1			YKR099W	1.63202	0.99995	0.30303
YDR397C	1.63211	1			YLR013W	1.63211	1	0.969697
YDR421W	1.63211	1			YLR014C	1.63203	0.999957	1
YDR423C	1.63208	0.999985			YLR098C	1.63211	1	0.969697
YDR432W	1.63211	1			YLR176C	1.62393	0.994995	0.939394
YDR443C	1.63211	1			YLR228C	1.63211	1	0.969697
YDR448W	1.63211	1			YLR278C	1.63211	1	0.939394
YDR451C	1.61729	0.990929			YLR403W	1.48072	0.907249	0.969697
YDR460W	1.63211	1			YLR451W	1.63211	1	0.30303
YDR463W	1.63211	1			YML007W	1.61955	0.992311	0.969697
YDR477W	1.63211	1			YML051W	1.09706	0.672176	0.969697
YDR496C	1.63211	1			YML076C	1.63197	0.999923	1
YDR520C	1.63211	1			YML099C	1.63211	1	0.969697
YEL009C	1.63211	1			YML113W	1.63211	1	0.969697
YER028C	0.885341	0.542455			YMR019W	1.63211	1	1
YER040W	0.833132	0.510466			YMR021C	1.57189	0.963108	0.818182
YER045C	0.969325	0.593913			YMR037C	1.63211	1	0.939394
YER051W	1.63211	1			YMR042W	1.59018	0.974314	1
YER064C	1.63211	1			YNL027W	1.63211	1	1
YER068W	1.58765	0.972763			YNL167C	1.63211	1	1
YER088C	1.63211	1			YNL199C	1.50865	0.92436	0.69697
YER109C	1.63211	1			YNL314W	1.63208	0.999988	1.0303
YER111C	1.63206	0.999974			YNR063W	1.63211	1	0.969697
YER130C	1.09378	0.670167			YOL028C	1.62761	0.997248	1
YER148W	1.63211	1			YOL067C	1.63211	1	0.121212
YER159C	1.63211	1			YOL108C	1.63211	1	0.181818
YER161C	1.60789	0.985165			YOL116W	1.63197	0.999922	0.969697
YER164W	1.63211	1			YOR028C	1.63202	0.99995	1.0303
YER169W	0.184179	0.112848			YOR113W	0.881312	0.539986	0.969697
YER184C	1.63211	1			YOR140W	0.956898	0.586299	0.939394
YFL021W	0.233788	0.143244			YOR344C	1.63205	0.999969	1.0303
YFL031W	1.63211	1			YOR358W	1.41946	0.869715	0.606061
YFL044C	1.63211	1			YOR363C	1.61708	0.990797	0.969697
YFL052W	1.63211	1			YOR380W	1.61675	0.990595	0.939394
YFR034C	1.49355	0.915108			YPL038W	1.63211	1	0.969697
YGL013C	1.63211	1			YPL089C	1.63211	1	1.0303
YGL025C	1.63211	1			YPL177C	1.63211	1	0.939394
YGL035C	1.63211	1			YPL202C	1.62363	0.994808	0.909091
YGL043W	1.63211	1			YPR008W	0.865073	0.530037	1
YGL071W	1.63211	1			YPR009W	1.63211	1	1.0303
YGL073W	1.62472	0.995479			YPR022C	1.63211	1	1
YGL096W	0.204016	0.125002			YPR065W	1.62429	0.995215	1.0303
YGL127C	1.63211	1			YPR196W	1.63211	1	0.939394
YGL131C	1.63211	1
YGL151W	1.63211	1
YGL162W	1.63197	0.999922
YGL166W	1.50513	0.922205
YGL181W	1.63211	1
YGL192W	1.63211	1
YGL197W	1.63211	1
YGL209W	0.805366	0.493454
YGL237C	0.328539	0.201298
YGL254W	1.60619	0.984123
YGR040W	1.63211	1
YGR044C	1.2968	0.794558
YGR063C	1.63211	1
YGR067C	1.63211	1
YGR089W	1.63211	1
YGR097W	1.63211	1
YGR116W	1.63211	1
YGR161C	1.63211	1
YGR249W	1.63205	0.99997
YGR252W	1.63211	1
YGR288W	1.63211	1
YHL009C	1.63211	1
YHL020C	0.362692	0.222224
YHL025W	1.63211	1
YHL027W	1.63211	1
YHR006W	0.808181	0.495178
YHR041C	1.63211	1
YHR084W	1.62744	0.997147
YHR090C	1.63211	1
YHR124W	1.63211	1
YHR178W	1.63211	1
YHR206W	1.5233	0.933338
YIL036W	1.61776	0.991212
YIL038C	1.63211	1
YIL056W	1.63211	1
YIL084C	1.63211	1
YIL101C	0.176755	0.108299
YIL119C	1.63211	1
YIL122W	1.63211	1
YIL128W	1.63211	1
YIL130W	1.63211	1
YIL131C	1.63204	0.999964
YIR013C	1.63211	1
YIR017C	0.316175	0.193723
YIR018W	0.810658	0.496696
YIR023W	1.63211	1
YIR033W	0.37302	0.228552
YJL056C	1.63207	0.99998
YJL089W	1.27094	0.778712
YJL103C	0.167849	0.102842
YJL110C	0.95236	0.583518
YJL127C	1.63211	1
YJL168C	1.63211	1
YJL176C	1.63211	1
YJL206C	1.57972	0.967906
YJR017C	1.63211	1
YJR060W	1.62023	0.99273
YJR094C	1.62568	0.996068
YJR119C	1.63211	1
YJR122W	1.63211	1
YJR127C	1.25533	0.769151
YJR140C	1.63211	1
YJR147W	1.59678	0.978358
YKL005C	1.4994	0.918695
YKL015W	1.62736	0.997098
YKL020C	1.63204	0.999965
YKL032C	1.63211	1
YKL038W	1.40785	0.8626
YKL043W	0.584635	0.35821
YKL062W	0.229248	0.140462
YKL072W	1.63211	1
YKL109W	0.14401	0.0882359
YKL112W	1.63211	1
YKL185W	1.63211	1
YKL222C	1.63211	1
YKR034W	0.873929	0.535463
YKR064W	1.63211	1
YKR099W	1.63202	0.99995
YKR101W	1.63211	1
YLL054C	1.63211	1
YLR005W	1.63211	1
YLR013W	1.63211	1
YLR014C	1.63203	0.999957
YLR015W	1.63211	1
YLR055C	1.63211	1
YLR098C	1.63211	1
YLR113W	1.63211	1
YLR131C	0.931566	0.570778
YLR136C	1.63211	1
YLR176C	1.62393	0.994995
YLR182W	1.61536	0.989746
YLR223C	0.148581	0.0910367
YLR228C	1.63211	1
YLR256W	1.18572	0.726501
YLR266C	1.63211	1
YLR278C	1.63211	1
YLR375W	1.63211	1
YLR399C	1.63211	1
YLR403W	1.48072	0.907249
YLR442C	1.63211	1
YLR451W	1.63211	1
YLR453C	1.63211	1
YML007W	1.61955	0.992311
YML010W	1.63211	1
YML027W	0.993689	0.608841
YML051W	1.09706	0.672176
YML076C	1.63197	0.999923
YML081W	1.63211	1
YML091C	1.63211	1
YML099C	1.63211	1
YML102W	1.63211	1
YML113W	1.63211	1
YMR016C	1.63202	0.99995
YMR019W	1.63211	1
YMR021C	1.57189	0.963108
YMR037C	1.63211	1
YMR039C	1.63211	1
YMR042W	1.59018	0.974314
YMR043W	1.63211	1
YMR053C	1.63211	1
YMR070W	1.63211	1
YMR075W	1.63211	1
YMR136W	1.63211	1
YMR164C	1.62231	0.994001
YMR168C	1.63211	1
YMR172W	1.63211	1
YMR179W	1.63211	1
YMR182C	1.61127	0.987236
YMR213W	1.63211	1
YMR228W	1.63211	1
YMR273C	1.63211	1
YMR280C	0.833201	0.510508
YNL023C	1.63211	1
YNL025C	1.63211	1
YNL027W	1.63211	1
YNL031C	1.63211	1
YNL068C	1.63211	1
YNL103W	1.61062	0.986841
YNL132W	1.63211	1
YNL139C	1.63211	1
YNL167C	1.63211	1
YNL199C	1.50865	0.92436
YNL204C	1.62671	0.996699
YNL216W	1.62847	0.997775
YNL236W	1.63211	1
YNL257C	1.63211	1
YNL309W	1.63202	0.99995
YNL314W	1.63208	0.999988
YNL330C	1.63211	1
YNR054C	1.63211	1
YNR063W	1.63211	1
YOL004W	1.63211	1
YOL028C	1.62761	0.997248
YOL067C	1.63211	1
YOL068C	1.63211	1
YOL089C	1.63211	1
YOL108C	1.63211	1
YOL116W	1.63197	0.999922
YOR028C	1.63202	0.99995
YOR032C	0.793831	0.486386
YOR038C	1.63211	1
YOR064C	1.63211	1
YOR077W	1.63211	1
YOR083W	1.63211	1
YOR113W	0.881312	0.539986
YOR140W	0.956898	0.586299
YOR162C	1.63205	0.999969
YOR172W	1.47694	0.90493
YOR210W	1.63211	1
YOR229W	1.63211	1
YOR230W	1.63211	1
YOR290C	1.63211	1
YOR298C-A	1.63211	1
YOR304W	1.63211	1
YOR315W	1.63211	1
YOR337W	1.62591	0.996204
YOR344C	1.63205	0.999969
YOR358W	1.41946	0.869715
YOR363C	1.61708	0.990797
YOR372C	1.63211	1
YOR380W	1.61675	0.990595
YPL016W	1.63211	1
YPL038W	1.63211	1
YPL042C	1.63211	1
YPL048W	1.63211	1
YPL049C	1.53012	0.937514
YPL075W	1.57166	0.962966
YPL082C	1.63211	1
YPL089C	1.63211	1
YPL122C	1.63211	1
YPL128C	1.63211	1
YPL129W	1.63211	1
YPL133C	0.89959	0.551185
YPL138C	1.63211	1
YPL139C	1.63211	1
YPL177C	1.63211	1
YPL181W	1.63211	1
YPL202C	1.62363	0.994808
YPL230W	0.102007	0.0625004
YPL254W	1.63211	1
YPR008W	0.865073	0.530037
YPR009W	1.63211	1
YPR013C	1.63211	1
YPR015C	1.63199	0.999931
YPR018W	1.63211	1
YPR022C	1.63211	1
YPR025C	1.63211	1
YPR031W	1.63211	1
YPR052C	1.63211	1
YPR054W	1.63211	1
YPR056W	1.63211	1
YPR065W	1.62429	0.995215
YPR104C	0.939646	0.575728
YPR196W	1.63211	1
YPR199C	1.63211	1
